1 **Cellular diversity in the *Drosophila* midbrain revealed by single-cell**  
2 **transcriptomics**

3

4 Vincent Croset<sup>1</sup>, Christoph D Treiber<sup>1,2</sup>, Scott Waddell<sup>2</sup>

5 Centre for Neural Circuits and Behaviour, The University of Oxford, Tinsley Building,  
6 Mansfield Road, Oxford, OX1 3SR, UK

7

8 <sup>1</sup> These authors contributed equally to this work

9 <sup>2</sup> To whom correspondence should be addressed: [christoph.treiber@gmail.com](mailto:christoph.treiber@gmail.com),  
10 [scott.waddell@cncb.ox.ac.uk](mailto:scott.waddell@cncb.ox.ac.uk)

11

12 **Abstract**

13 To understand the brain, molecular details need to be overlaid onto neural wiring  
14 diagrams so that synaptic mode, neuromodulation and critical signaling operations  
15 can be considered. Single-cell transcriptomics provide a unique opportunity to collect  
16 this information. Here we present an initial analysis of thousands of individual cells  
17 from *Drosophila* midbrain, that were acquired using Drop-Seq. A number of  
18 approaches permitted the assignment of transcriptional profiles to several major brain  
19 regions and cell-types. Expression of biosynthetic enzymes and reuptake  
20 mechanisms allows all the neurons to be typed according to the neurotransmitter or  
21 neuromodulator that they produce and presumably release. Some neuropeptides are  
22 preferentially co-expressed in neurons using a particular fast-acting transmitter, or  
23 monoamine. Neuromodulatory and neurotransmitter receptor subunit expression  
24 illustrates the potential of these molecules in generating complexity in neural circuit  
25 function. This cell atlas dataset provides an important resource to link molecular  
26 operations to brain regions and complex neural processes.

## 27 Introduction

28 Neuroscience is typically studied at the systems, cellular, or molecular level.  
29 However, it will be necessary to bridge these traditional boundaries to fully  
30 understand how the brain operates. Such a momentous task is somewhat simplified  
31 if analyses are focused on an animal with a relatively small brain, but where systems-  
32 level processes are evident. In many respects, the vinegar fly *Drosophila*  
33 *melanogaster* fits the bill (Haber Kern and Jayaraman, 2016). *Drosophila* have an  
34 estimated 150,000 neurons in the entire brain, of which the optic lobes, or visual  
35 neuropils, comprise two thirds of this neural mass. The remaining approximately  
36 50,000 neurons, or midbrain, houses many key neural structures such as the  
37 mushroom bodies and central complex, which are, amongst other things, critical for  
38 memory-directed behavior (Cognigni et al., 2018) and navigation (Seelig and  
39 Jayaraman, 2015), respectively.

40 Recent large-scale electron-microscopy projects have generated wiring diagrams, or  
41 connectomes, of parts of the larval and adult fly nervous system (Berck et al., 2016;  
42 Eichler et al., 2017; Ohyama et al., 2015; Takemura et al., 2013, 2017a, 2017b;  
43 Tobin et al., 2017; Zheng et al., 2017). While these efforts are an essential part of the  
44 quest to decipher brain function, they are not enough. Genes determine the anatomy  
45 and mode of connectivity, the biophysical properties, and the information-processing  
46 limits of individual constituent neurons. Therefore, understanding any given wiring  
47 diagram requires a systematic view of gene expression within their functionally  
48 relevant cellular context. With this knowledge in hand, investigators can begin to  
49 examine how gene products contribute to cell- and circuit-specific functions and,  
50 ultimately, organismal behavior.

51 New developments in single-cell sequencing technology provide a unique means to  
52 generate such a brain-wide view of gene expression with cellular resolution.  
53 Massively parallel approaches, such as Drop-seq (Macosko et al., 2015), permit  
54 simultaneous analysis of the transcriptomes of 1000s of individual cells. In brief, each  
55 cell from a dissociated tissue is first captured with an oligonucleotide bar-coded bead  
56 in a nanoliter aqueous droplet. The bar-coding allows all of the mRNAs expressed in  
57 a cell to be assigned to the same cell, and for the identity of the cell to be  
58 remembered. Following this critical cell-specific hybridization step, all the material  
59 from 1000s of individual cells can be pooled and processed together for mRNA  
60 sequencing. Drop-seq therefore provides the means to access the transcriptomes of  
61 a representation of most cells in the fly midbrain.

62 A key hurdle in generating a single-cell atlas of the brain is the ability to assign  
63 individual transcriptome profiles to the correct cell, or at least cell-type. Again, using  
64 an animal whose brain has an intermediate number of neurons and presumably  
65 neural diversity simplifies the task. Moreover, years of genetic analyses in *Drosophila*  
66 have provided a considerable number of established transgenic and intrinsic markers  
67 for specific brain regions and cell-types. These identifiers often allow one to extract  
68 the relevant cell profiles from the larger dataset.

69 Here we report the application and an initial analysis of Drop-seq data to investigate  
70 the cellular diversity of the *Drosophila* midbrain. We demonstrate the ability to assign  
71 many single-cell profiles to identified cell-types and brain regions, and identify novel  
72 markers for these regions. Moreover, cells can be robustly classified based on their  
73 neurotransmitter (NT) profile. We find that certain neuropeptides preferentially  
74 accompany particular fast-acting transmitters, or monoamines. In addition, we detail  
75 the apparent complexity of modulatory and NT receptor subunit expression. This  
76 single-cell dataset provides an indication of the extent of neural diversity in the fly  
77 brain, and provides essential cellular context linking molecules to neural circuits and  
78 brain function.

## 79 Results

### 80 Drop-seq analysis of the *Drosophila* midbrain

81 We first optimized the conditions required to effectively dissociate and capture  
82 individual *Drosophila melanogaster* cells with DNA bar-coded microparticles in  
83 aqueous droplets, using a commercially available apparatus. *Drosophila* neurons are  
84 about a tenth of the size of mammalian cells. We therefore first verified the efficiency  
85 of processing insect cells and of single-cell capture by generating single-cell  
86 transcriptomes attached to microparticles (STAMPs) from a cell suspension  
87 comprised of a 1:1 mixture of *Drosophila* S2 and *Spodoptera frugiperda* (fall  
88 armyworm) Sf9 cultured cells. We then sequenced these S2/Sf9 STAMPs (Fig. 1 -  
89 figure supplement 1A). This procedure retrieved 764 barcode-associated  
90 transcriptomes, of which 368 were identifiable as *Drosophila* and 384 as *Spodoptera*.  
91 Importantly, only 12 transcriptomes contained cDNA coming from both species (Fig.  
92 1 - figure supplement 1B), indicating that only 3.1% of all sequenced transcriptomes  
93 resulted from capturing two cells together. This analysis suggested that the Drop-seq  
94 system and our chosen parameters are suitable for barcoding single insect cells and  
95 are optimized to minimize capture of cell doublets.

96 We next used these same parameters to collect STAMPs from thousands of cells  
97 from the *Drosophila* midbrain, in eight independent experiments, over eight different  
98 days. Each day we isolated single-cells from 80-100 dissected brains taken from an  
99 equal number of male and female flies. Brains were removed from the head capsule,  
100 optic lobes were manually dissected away and a single-cell suspension was  
101 prepared from the remaining fly midbrains. Cells were then individually paired with  
102 DNA barcoded beads and cDNA libraries were generated from bead-bound single-  
103 cell transcriptomes, and sequenced (Fig. 1A) (Macosko et al., 2015). Pooling the  
104 data from the eight independent experiments resulted in a dataset of 19,260 cells,  
105 with each containing between 200 and 10,000 unique molecular identifiers (UMIs)  
106 and therefore, single mRNA molecules. We performed a Principle-Component  
107 Analysis (PCA) on these transcriptomes and reduced the top 50 PCs into two  
108 dimensions using t-SNE (Van Der Maaten, 2014) (Fig. 1 - figure supplement 2A). We  
109 selected the cut-off for the optimal number of UMIs per cell to be included in our  
110 analyses by generating t-SNE plots from data with a variety of quality thresholds.  
111 These analyses revealed that discarding cells with less than 800 UMIs, resulted in a  
112 data set of 10,286 high quality cells, segregated with k-means clustering into 29 cell  
113 clusters, with several corresponding to most of the known iterative cell types in the

114 *Drosophila* brain (Fig. 1 - figure supplement 2B). More stringent criteria decreased  
115 the number of cells included without further improving the clustering (Fig. 1 - figure  
116 supplement 2C). A comparison between our eight individual replicate experiments  
117 revealed that all of them contributed equally to all but one cluster (Fig. 1 - figure  
118 supplement 3). We therefore chose to use the 10,286 cells that have  $\geq 800$  UMIs from  
119 our eight pooled replicates for our subsequent analyses.

120 We assessed the transcript drop-out rate, by determining the number of cells that can  
121 be seen to express the male-specific long non-coding *RNA on the X 1 (roX1)* gene  
122 (Kelley and Kuroda, 2003). The distribution of UMIs for this gene was biphasic, with  
123 one peak at 0, and another at 9 UMIs (Fig. 1 - figure supplement 4A). Since our data  
124 was prepared from an equal number of male and female brains we reasoned that  
125 these two populations must represent cells from female and male flies, respectively.  
126 We used the median between the two peaks (4.5) as cut-off to separate these two  
127 populations which revealed that 43.1% of all the cells express *roX1* and therefore can  
128 be considered male (Fig 1 - figure supplement 4B). Since this number is close to the  
129 expected 50%, this distribution suggests that transcript drop-out is low in our high-  
130 quality dataset of 10,286 cells. Interestingly, the neural Cluster J and Glial cluster 2  
131 are almost exclusively comprised of *roX1*-negative cells, suggesting that they may  
132 contain cells that are only present in the female brain.

133 We manually annotated 28 clusters in the t-SNE plot of 10,286 cells, with each  
134 containing between 9 and 7167 cells (Fig. 1B). We assigned cell identity to a number  
135 of cell clusters according to the markers in Supplementary File 2 (which contains the  
136 list of genes that are significantly over-expressed in each of these clusters, compared  
137 to all others); the mushroom body (MB) Kenyon Cells (KCs), olfactory projection  
138 neurons (PNs), ellipsoid body (EB) ring neurons, monoaminergic neurons, astrocytes  
139 and other glia, and insulin producing cells (IPCs). We also identified a few cells from  
140 the ocelli, in addition to fat body tissue, some of which is present in the head capsule  
141 and therefore is also expected to be included in our dissected brain tissue. We also  
142 identified 12 additional cell clusters that we could not at this time assign to a  
143 particular neural type, and that we name with the letters A-L. Surprisingly, cluster G  
144 only contained cells obtained from a single replicate experiment (Fig. 1 - figure  
145 supplement 3). The largest cluster of all contains 7167 cells with a variety of  
146 expression profiles, that at this stage of analysis, we marked as “unannotated”, but  
147 that can nevertheless be segregated for example, based on their primary fast-acting  
148 NT (see below, and Fig. 4).

149

## 150 **Identification of mushroom body Kenyon Cells**

151 The easiest and most certain way to assign a Drop-seq cluster to a specific cell-type  
152 is to track the expression of a transgenically expressed marker. For this reason, our  
153 single-cell expression dataset, was generated from a genotype of flies that express  
154 an mCherry transgene specifically in the  $\alpha\beta$  subset of MB KCs (Fig. 2A). In addition,  
155 we have previously deep-sequenced the genome of this strain at high coverage  
156 (Treiber and Waddell, 2017) which enabled more precise mapping of Drop-seq reads  
157 to the genome of this particular fly strain. To our surprise, visualizing mCherry  
158 expression levels in our dataset revealed labeling of a very distinct group of cells  
159 (Fig. 2B), that allowed us to assign this cluster to  $\alpha\beta$  KCs.

160 The MB is a brain structure that is critical for olfactory learning and memory (de Belle  
161 and Heisenberg, 1994; Cognigni et al., 2018; Heisenberg, 2003) and it is comprised  
162 of three main classes of neurons, the  $\alpha\beta$ ,  $\alpha'\beta'$  and  $\gamma$  neurons, that are  
163 morphologically unique and have dissociable roles in memory processing and  
164 expression (Bouzaiane et al., 2015; Perisse et al., 2013). We first identified the  $\alpha'\beta'$   
165 and  $\gamma$  KC types, using the expression of the previously known general KC markers  
166 *eyeless* and *Dop1R2* (aka *Dopamine receptor in mushroom bodies, damb*) (Han et  
167 al., 1996; Kurusu et al., 2000). Cells expressing these two markers were contained  
168 within three distinct clusters, including the  $\alpha\beta$  cluster identified as expressing  
169 mCherry (Fig. 2C-D). The  $\alpha\beta$  and  $\gamma$  KCs have previously been shown to be  
170 distinguishable from the  $\alpha'\beta'$  neurons using the expression of molecular markers. The  
171  $\alpha\beta$  and  $\gamma$  KCs express *short neuropeptide F precursor (sNPF)* (Johard et al., 2008)  
172 and *Fasciclin 2 (Fas2)* (Cheng et al., 2001; Crittenden et al., 1998), whilst  $\alpha'\beta'$  and  $\gamma$   
173 KCs express the rho guanyl-nucleotide exchange factor gene *trio* (Awasaki et al.,  
174 2000). The expression patterns of these three genes, permitted us to assign each KC  
175 cluster to one of these KC subtypes (Fig. 2E). Furthermore, we identified 26  
176 additional genes that are differentially expressed between KC subtypes (Fig. 2F). Of  
177 these, ten have roles in gene regulation, five in signal transduction, and three in  
178 synapse function.

179

## 180 **Identification of olfactory projection neurons**

181 We assigned two cell clusters to PNs (Fig. 1B), based on the strong expression of  
182 two previously described markers, *cut* (*ct*) and *abnormal chemosensory jump 6*  
183 (*acj6*). The *ct* gene encodes a homeobox transcription factor involved in dendrite  
184 targeting in PNs and is known to be expressed in a subset of the antero-dorsal (ad-),  
185 lateral (l-) and ventral (v-) PNs (Komiyama and Luo, 2007). The *acj6* gene encodes a  
186 POU-domain transcription factor that is also necessary for PN development and has  
187 been described to label all adPNs and a subset of IPNs (Komiyama et al., 2003; Lai  
188 et al., 2008) (Fig. 3C). We next isolated the cells from these clusters and performed a  
189 new PCA and t-SNE analysis on the top six PCs. PNs segregated into four distinct  
190 clusters, each of which expresses a specific transcriptional signature (Fig. 3 A-B).  
191 Consistent with the expression patterns mentioned above, *ct* transcripts were found  
192 in all four PN clusters, whereas *acj6* was only identified in three of them (Clusters 1,  
193 2 and 4; Fig. 3C). Interestingly, *ventral veins lacking* (*vvl*), another POU-domain  
194 transcription factor reported to be expressed in *acj6*-negative IPNs (Komiyama et al.,  
195 2003; Li et al., 2017) only labeled a small number of neurons, which were all part of  
196 the cluster that was negative for *acj6* (Cluster 3; Fig. 3C). Our data therefore confirm  
197 the non-overlapping expression patterns of *acj6* and *vvl*, and support the assignment  
198 of the *vvl* expressing cluster to cells including the IPNs.

199 To identify putative ventral PNs (vPNs), we used expression of *Lim1*, which encodes  
200 a LIM-homeodomain transcription factor reported to be expressed in most vPNs, but  
201 not in adPNs or IPNs (Komiyama and Luo, 2007; Li et al., 2017). Surprisingly, *Lim1*  
202 labeled one of the three *acj6*-positive clusters, and several neurons co-expressed  
203 both *Lim1* and *acj6* (Cluster 4; Fig. 3C). This contrasts with a previous study that  
204 indicated that *acj6* and *Lim1* expression does not overlap, as a result of these two  
205 genes being expressed in progeny derived from discrete PN neuroblasts (Komiyama  
206 and Luo, 2007). About 50% of the *acj6*-positive neurons were recently shown to  
207 express *knot* (*kn*), another transcription factor involved in dendrite morphology  
208 (Jinushi-Nakao et al., 2007; Li et al., 2017). Consistently, we found that the two  
209 *acj6*<sup>+</sup>/*Lim1*<sup>-</sup> clusters (clusters 1 and 2) segregate according to *kn* expression (Fig.  
210 3C).

211 We also identified three to eight genes in each PN cluster that were significantly  
212 over-expressed, as compared to the expression in other PN clusters (Fig. 3B). Of  
213 potential functional importance, we found that the *acj6*<sup>+</sup>/*kn*<sup>+</sup> PNs express the *sNPF*  
214 neuropeptide gene, whereas neurons encompassing the putative IPNs express  
215 *Tachykinin* (*Tk*). These data suggest that these two classes of otherwise cholinergic

216 neurons might co-release different neuropeptides. Interestingly, the sNPF and Tk  
217 neuropeptides have previously been reported to have a modulatory role in the  
218 antennal lobe, although these studies concluded that the peptides were released  
219 from olfactory receptor neurons and local interneurons, respectively (Ignell et al.,  
220 2009; Nässel et al., 2008). More recently, others have also detected the expression  
221 of *Tk* in PNs (Li et al., 2017).

222

### 223 **Assigning fast-acting neurotransmitters**

224 We next assessed the proportion and distribution of cells in our data set that express  
225 genes that would indicate they release a particular fast-acting NT; acetylcholine  
226 (ACh), glutamate (Glu) and gamma-aminobutyric acid (GABA). We determined that  
227 cells were cholinergic, glutamatergic or GABA-ergic based on the expression of  
228 *vesicular acetylcholine transporter (VAChT)*, *vesicular glutamate transporter (VGlut)*  
229 and *glutamic acid decarboxylase 1 (Gad1)*, three key proteins that are either required  
230 for the vesicular loading, or metabolism, of ACh, Glu and GABA respectively.

231 Consistent with our expectations, this analysis labelled the cell clusters that most  
232 likely represent KCs and PNs as being cholinergic (Barnstedt et al., 2016; Tanaka et  
233 al., 2012), while the EB cluster is comprised of GABAergic cells (Fig 4A) (Kahsai et  
234 al., 2012). Reassuringly, we did not find significant NT marker expression in glia,  
235 including astrocytes.

236 Cells expressing these NT-specific marker genes were largely exclusive, although  
237 6% of cells contained markers for ACh and GABA and 6% for ACh and Glu. It is  
238 therefore conceivable that some cells release excitatory and inhibitory NTs. A smaller  
239 percentage of cells expressed markers for Glu and GABA (3%), of which a third (1%)  
240 expressed all three NT markers (and therefore possibly represent multiple cell  
241 captures) (Fig. 4B).

242

### 243 **Analysis of Neuropeptide expression**

244 We also analyzed the expression of neuropeptides in our Drop-seq dataset. We first  
245 investigated whether individual neuropeptide-encoding genes were preferentially  
246 expressed in neurons that co-transmit/co-release a particular fast-acting NT ACh, Glu  
247 or GABA (Fig 7A). *sNPF*, *CCHamide-2 (CCHa2)*, *Tk*, *space blanket (spab)*, *jelly belly*  
248 (*jeb*) and *amnesiac (amn)* showed a strong preference for expression in cholinergic



249 neurons, whereas *Diuretic hormone 31 (Dh31)* is highly biased to GABA-ergic  
250 neurons. *Neuropeptide-like precursor 1 (Nplp1)* and *Allatostatin A (AstA)* were mainly  
251 expressed in glutamatergic cells.

252 Some other peptide-encoding genes show a strong anti-correlation with a particular  
253 transmitter. For example *neuropeptide F (dNPF)*, *sNPF*, *Tk*, *spab*, *jeb*, *Allatostatin C*  
254 (*AstC*), *Diuretic hormone 44 (Dh44)*, *CCHa2* and *Myosuppressin (Ms)* were anti-  
255 correlated with GABA-ergic cells. Similarly, *Myoinhibitory peptide precursor (Mip)*,  
256 *pigment-dispersing factor (PDF)* and *SIFamide (SIFa)* were absent from cholinergic  
257 neurons.

258 *Ms* showed an interesting bias for expression in cells that express two (Glu and ACh  
259 or Glu and GABA ) or all three fast acting NTs. We also noticed that the specificity  
260 towards cells expressing only one type of fast-acting NT varied between  
261 neuropeptides, with some such as PDF, exhibiting a broad and general expression  
262 pattern, other than the anti-correlation with ACh.

263 The abundance and specificity of expression across the midbrain also varied  
264 between individual neuropeptides. Some neuropeptide-encoding genes are only  
265 expressed in 1-2% of cells (e.g. *CCHa2*, *amn*, *dNPF*, *Mip*, *PDF* and *SIFa*), and their  
266 release could therefore potentially represent signals of, for example, internal states.  
267 Others, such as *spab*, *sNPF* and *Nplp1*, are very broadly expressed in 20-25% of all  
268 cells (see Supplementary file 1), suggesting that these neuropeptides likely act as  
269 modulatory co-transmitters with fast-acting NTs.

270 Some neuropeptide expression patterns are highly specific to certain cell types. For  
271 example, *Dh31* is mainly expressed by EB neurons whereas *sNPF* is strongly  
272 expressed in KCs (Fig. 2E), in a subdivision of PNs (Fig. 3B) and in two clusters that  
273 have not yet been assigned to a specific cell-type. Furthermore, although both *spab*  
274 and *Nplp1* are very broadly expressed, their expression patterns are strongly anti-  
275 correlated, suggesting that they may have complementary functions in the *Drosophila*  
276 midbrain.

277 We also found transcripts for the *Drosophila* insulin-like peptides 2, 3, 5 and 6 (Fig  
278 5B). The *Ilp2*, *Ilp3* and *Ilp5* peptides are exclusively expressed in IPCs in the brain,  
279 whilst *Ilp6* is expressed in glia (Brogiolo et al., 2001; Okamoto et al., 2009). We found  
280 that *Ilp2*, 3 and 5 expression was weakly correlated with that of NTs, whilst *Ilp6*  
281 expression is strongly correlated with cells that do not express NT markers,  
282 consistent with glial expression.

283

## 284 **Assignment and subdivision of monoaminergic neurons**

285 We used expression of the *vesicular monoamine transporter (Vmat)* gene to identify  
286 monoaminergic neurons in our midbrain dataset (Figure 6A). Three discrete cell  
287 populations clearly expressed *Vmat*. We performed a new PCA and tSNE analysis  
288 on cells from these three clusters, guided by known markers for serotonin (5-HT),  
289 tyramine (Tyr), octopamine (OA) and dopamine (DA) releasing neurons. *Ddc* (Dopa  
290 decarboxylase) labels 5-HT and DA neurons, *SerT* (Serotonin transporter) and *Trh*  
291 (Tryptophan hydroxylase ) mark 5-HT neurons, *pale* (tyrosine hydroxylase) and *DAT*  
292 (Dopamine transporter) DA neurons, *Tdc2* (Tyrosine decarboxylase 2) Tyr and OA  
293 neurons, *Tbh* (tyramine  $\beta$ -hydroxylase) OA neurons. These labels allowed us to  
294 identify the neuronal clusters corresponding to each of these cell types (Figure 6B).

295 In addition to known markers of monoaminergic neuronal types, we found new genes  
296 expressed in these populations (Fig. 6C), that are likely to have an important role for  
297 their development and connectivity, such as *kekkon 1 (kek1)* in dopaminergic  
298 neurons (DANs) (Ghiglione et al., 1999), or *IGF-II mRNA-binding protein (Imp)* and  
299 *Jim Lovell (lov)* in serotonergic neurons (Bjorum et al., 2013; Geng and Macdonald,  
300 2006; Munro et al., 2006). High expression in Tyr neurons of *hikaru genki (hig)*, which  
301 encodes a protein generally found in the synaptic clefts of cholinergic synapses  
302 (Nakayama et al., 2014, 2016), may highlight the importance of cholinergic input to  
303 these neurons.

304 Many neurons release more than one NT. We therefore investigated whether the  
305 different types of monoaminergic neurons co-expressed markers for fast-acting  
306 transmitters. The most striking evidence in these analyses suggest that many  
307 octopaminergic and tyraminergetic neurons likely co-release Glu, and less of them  
308 GABA, or ACh. (Fig. 6D).

309 We also tested whether monoaminergic neurons co-expressed neuropeptide genes.  
310 Many mature neuropeptides are amidated at their C-terminus through the sequential  
311 enzymatic action of the *Phm* and *Pal2* encoded peptidylglycine- $\alpha$ -hydroxylating  
312 monooxygenase and peptidyl- $\alpha$ -hydroxyglycine  $\alpha$ -amidating lyase (Han et  
313 al., 2004; Jiang et al., 2000; Kolhekar et al., 1997). These genes were expressed in  
314 50% and 81% of all monoaminergic neurons, respectively (Fig. 6E), suggesting that a  
315 significant proportion of monoaminergic neurons likely co-release neuropeptides.  
316 Indeed, we found expression of *Dh44*, *Nplp1*, *Glycoprotein hormone beta 5 (Gpb5)*

317 and *Proctolin* (*proc*; which is not amidated) in up to 21% of DANs (Fig. 6E). 61% of  
318 DANs express at least one neuropeptide and 32% express two, or more. *Dh44*,  
319 *Nplp1* and *spab* were found in up to 30% of 5-HT neurons, with 90% of these  
320 expressing one or two neuropeptides (Fig. 6E).

321 Perhaps surprisingly, OA and Tyr neurons contained mRNA for many neuropeptides.  
322 We found that 85% of OA neurons express at least one neuropeptide, whereas 46%  
323 express two, or more. Co-expression was even more evident in Tyr neurons; 83%  
324 expressed one, whereas 78% express two or more. *Nplp1*, *Gpb5*, and *SIFa* were  
325 detected in Tyr and OA neurons, whereas *Dh44*, *Ms* and *spab* were only identified in  
326 OA neurons, and *sNPF*, *Dh31*, *Mip*, *Ilp2* and *ITP* were exclusively found in Tyr  
327 neurons (Fig. 6E). *Dh44* was the most broadly expressed, being detected in 46% of  
328 OA neurons. *Mip* and *SIFa* were each expressed in 44% of Tyr neurons, and were  
329 co-expressed in 33% of them. Together, these results indicate that neuropeptide  
330 expression, and co-expression, is a common feature of many monoaminergic  
331 neurons. The obvious complexity and possible heterogeneity of neuropeptide  
332 expression may reflect functional specialization of individual, or small groups of these  
333 monoaminergic neurons.

334 Prior work has shown that DANs are anatomically and functionally divisible based on  
335 roles in motivation, learning and memory and arousal (Huetteroth et al., 2015;  
336 Krashes et al., 2009; Nall et al., 2016; Yamagata et al., 2015). Some of this DAN  
337 subdivision has also been associated with the expression of particular transcription  
338 factors, receptors for specific neuropeptides, or other monoamines (Dib et al., 2014;  
339 Ichinose et al., 2015; Krashes et al., 2009). DANs implicated in learning and memory  
340 reside in two discrete clusters, called PPL1 and PAM. PPL1 DANs mostly convey the  
341 negative reinforcing effects of aversive stimuli, such as electric shock, high heat or  
342 bitter taste (Aso et al., 2012; Das et al., 2014; Galili et al., 2014), whereas the  
343 numerically larger PAM cluster contains DANs that appear somewhat specialized in  
344 representing particular types of rewards, such as the sweet taste and nutrient value  
345 of sugars, or water (Burke et al., 2012; Huetteroth et al., 2015; Lin et al., 2014; Liu et  
346 al., 2012; Yamagata et al., 2015). Prior work demonstrated that PAM DANs express  
347 the transcription factor *48 related 2* (*Fer2*), which is required for their development  
348 and survival (Dib et al., 2014). We found that 44 neurons in the DA cluster (37%)  
349 express *Fer2* (Fig. 6B). We therefore consider these *Fer2*-positive cells to represent  
350 PAM DANs. 15 additional genes are significantly over-expressed in these cells, in  
351 comparison to the rest of the brain (Fig. 6F). Amongst them we found *Ddc*, *ple*, *Vmat*

352 and *DAT*, that are essential for DA synthesis, vesicle loading and transport  
353 (Yamamoto and Seto, 2014). Potential new markers for PAM DANs include the  
354 transcription factor *scarecrow* (*scro*), the amino-acid transporter *Jhl1-21*, the Dpr-  
355 interacting protein *DIP-delta*, the PDGF- and VEGF-related growth factor *Pvf3*, the  
356 EGFR modulator *kek1*, as well as five novel genes; *CG1402*, *CG13330*, *CG17193*,  
357 *CG10384* and *CG42817*.

358 To corroborate the expression of these new markers in PAM neurons, we compared  
359 this data to a transcriptome profiling dataset that was acquired from sequencing  
360 mRNA extracted from populations of GFP labeled PAM DANs. We used R58E02-  
361 GAL4, a PAM-specific line (Liu et al., 2012; Pfeiffer et al., 2008) to express UAS-  
362 6xGFP (Shearin et al., 2014) specifically in PAM DANs, and purified the cells by  
363 Fluorescence Activated Cell Sorting (FACS). We prepared mRNA from GFP+ and  
364 GFP- neurons, which was subsequently reverse-transcribed and amplified using  
365 Smart-seq2, and sequenced. This analysis identified about 10 times more (143)  
366 genes that were significantly over-expressed in PAM neurons, as compared to the  
367 number retrieved with Drop-seq (Fig. 6F). This return is consistent with previous  
368 reports showing a higher recovery rate with Smart-seq2 compared to Drop-seq, but  
369 also higher levels of noise, as Smart-seq2 does not employ UMIs (Ziegenhain et al.,  
370 2017). Of the 15 genes found to be over-expressed in PAM neurons in the Drop-seq  
371 experiment, 9 (*ple*, *DAT*, *Fer2*, *Jhl-21*, *scro*, *DIP-delta*, *CG10384*, *CG17193* and  
372 *CG42817*) were also retrieved in the Smart-seq2 data (Fig. 6F). This confirms that  
373 these genes are specifically expressed in PAM neurons. Furthermore, with the  
374 exception of *ple*, *DAT* and *Fer2*, these genes have not been previously localized to  
375 PAM neurons, and therefore represent novel markers for this cell-type.

376

### 377 **Dopamine receptors**

378 Cells respond to DA using a variety of DA receptors in their cell membrane.  
379 Interestingly, our analysis shows that all four DA receptors are found in KCs, which  
380 form numerous synapses with DA neurons at the MB lobes (see above; Fig. 7B).  
381 Many KCs co-express several of these receptors, and 24% of them even express all  
382 four receptors (Fig. 7C). Other cell types express combinations of DA receptors, to  
383 varying degrees. In addition to KCs, *Dop1R1* (*dumb*) and *Dop1R2* (*damb*) are found  
384 in a few other clusters (Fig. 7B), in particular in several of those that we could not  
385 attribute to any cell type. This information will be helpful for further characterizing

386 these clusters. Consistent with evidence showing that *Dop1R1* is expressed in the  
387 Central complex where it regulates arousal (Kahsai et al., 2012; Lebestky et al.,  
388 2009), we found limited expression of *Dop1R1* in the EB, suggesting that only a  
389 subset of these neurons are involved in this process. *Dop1R1* also seems to be  
390 expressed in small numbers of monoaminergic neurons, suggesting that it may play  
391 a role in autocrine signaling. However, the main candidate receptor for DA autocrine  
392 signaling is *Dop2R*, which was found to be broadly expressed in DANs, and also in  
393 large numbers of other monoaminergic neuronal types (Fig. 7B). Interestingly, *Dop2R*  
394 expression was also detected in some PNs and IPCs as well as a few non-attributed  
395 clusters, which indicates that the activity of these neurons is also subject to  
396 dopaminergic modulation. Finally, the Dopamine/Ecdysteroid receptor (*DopEcR*) was  
397 found in several cell types, including KCs, PNs, the ocelli, and many other non-  
398 attributed clusters (Fig. 7B), suggesting a broad role for this receptor. Expression of  
399 this *DopEcR* in PNs corroborates previous data showing its involvement in  
400 pheromone sensitization in these neurons, both in flies and moths (Abrieux et al.,  
401 2014; Aranda et al., 2017).

402

### 403 **Dopamine metabolism**

404 DA signaling is regulated by enzymatic degradation and reuptake through  
405 transporters. Recycled metabolites can then be used to resynthesize DA. These  
406 steps can occur in different cell types, that could be DA-releasing cells, post-synaptic  
407 neurons, or glia (Yamamoto and Seto, 2014) (Fig. 7A). We therefore used our Drop-  
408 seq data to determine which cell types expressed components of the DA recycling  
409 and metabolic pathways.

410 As expected, the first step of DA synthesis, conversion of tyrosine into the DA  
411 precursor L-DOPA catalyzed by the *ple* encoded Tyrosine hydroxylase appears to  
412 occur exclusively in DANs (Fig. 7B). In comparison *Ddc*, which converts L-DOPA to  
413 DA, is also involved in 5-HT synthesis, and so was expressed in DA and 5-HT  
414 neurons. Interestingly, *Ddc* also labels several other neuronal populations, including  
415  $\alpha\beta'$  and  $\gamma$  KCs, one cluster of olfactory PNs, and several non-identified, alphabet  
416 labeled clusters (Fig. 7B). It is not clear if *Ddc* in these neurons is involved in the  
417 metabolism of DA or other aromatic L-amino acids.

418 Three enzymes have been described to play a role in DA degradation and recycling.  
419 The *ebony* (*e*) gene product converts DA into N-beta-alanyldopamine (NBAD)

420 (Hovemann et al., 1998; Suh and Jackson, 2007) and was almost exclusively  
421 expressed in astrocytes in our data (Fig. 7B). Dopamine-N-acetyltransferase,  
422 encoded by *Dat*, converts DA into N-acetyl dopamine (NADA). Interestingly, *Dat* was  
423 abundant in astrocytes, in smaller amounts in other glia, and was also detected in the  
424 EB and a few other subsets of neurons (Fig. 7B). Although these results highlight the  
425 important role of glia, and in particular astrocytes, in DA reuptake, metabolism and  
426 recycling, other cells appear to convert DA into NADA rather than into NBAD. The  
427 fate and consequence of these two metabolites in each cell type remains largely  
428 unknown. Finally, *tan (t)*, a gene coding for a hydrolase that can convert NBAD back  
429 into DA, was not found in any cell population from the central brain itself (Fig. 7B),  
430 suggesting that this recycling pathway is not utilized there. However, several cells  
431 from the ocelli express this enzyme, consistent with the function of *t* in the histamine  
432 metabolism in photoreceptors (Borycz et al., 2002; True et al., 2005).

433 The vesicular monoamine transporter (encoded by *Vmat*) transports DA, 5-HT, OA  
434 and Tyr into synaptic vesicles (Martin and Krantz, 2014). As already mentioned,  
435 *Vmat* was detected in all these neuronal types. In addition, *Vmat* expression was  
436 evident in fat body cells. Although this has, to our knowledge, never been  
437 demonstrated in flies, perivascular adipose tissue in rats contains monoamines  
438 acting on the sympathetic nervous system, and is thus likely to express VMAT  
439 (Ayala-Lopez et al., 2014). The *DAT*-encoded DA transporter mediates DA reuptake  
440 of by DANs. Unlike *Vmat*, *DAT* was specifically expressed in dopaminergic, but not  
441 other monoaminergic neurons. Surprisingly, we also found *DAT* expression in  $\alpha'\beta'$   
442 KCs, suggesting that these neurons might tightly regulate their reception duration  
443 and magnitude of DA signals.

444

#### 445 **Distribution of nicotinic neurotransmitter receptors**

446 The response of a neuron to a particular NT is determined by the types of receptors  
447 that that cell expresses. In addition, most ionotropic NT receptors are oligomers  
448 comprised of combinations of subunits, variations of which can have very different  
449 functional characteristics (Sattelle et al., 2005). Acetylcholine is a major excitatory NT  
450 in the insect brain and is the primary fast-acting NT released from olfactory receptor  
451 neurons, olfactory PNs and MB KCs. Nicotinic acetylcholine receptors (nAChR) are  
452 heteropentamers that can be comprised of 2 or 3 alpha and the corresponding 3 or 2  
453 beta subunits. Flies have 7 alpha subunit genes and 3 types of beta encoding genes.

454 These receptors have mostly been studied at the vertebrate neuromuscular junction  
455 (Albuquerque et al., 2009) and very little is known about the composition of nAChR in  
456 neurons in a central nervous system. Although gene expression cannot explicitly  
457 inform of subunit composition, co-expression is a prerequisite that limits the potential  
458 complexity in any given neuron. We therefore analyzed the co-expression of nAChR  
459 subunits in our Drop-seq dataset. We detected the expression, at varying  
460 frequencies, of all seven known nAChR  $\alpha$ -subunits, and two of the three known  $\beta$ -  
461 subunits in our samples (Fig. 8A).  $\alpha 1$ ,  $\alpha 5$ ,  $\alpha 6$  and  $\alpha 7$  are expressed in considerably  
462 more cells than  $\alpha 2$ ,  $\alpha 3$  and  $\alpha 4$ , whereas  $\beta 1$  is expressed in more than twice as many  
463 cells as  $\beta 2$ . Most subunits are broadly expressed across all cell types, although some  
464 exhibit very distinct expression patterns. Most notably,  $\alpha 3$  is broadly expressed in the  
465 midbrain, but distinctly absent in KCs. We also tested for co-expression of different  
466 combinations of receptor subunits (Figure 8B). Expression of  $\alpha 5$  most strongly  
467 correlated with expression of  $\alpha 6$  and  $\beta 1$ . In contrast  $\alpha 3$  weakly correlated with  
468 expression of  $\alpha 6$  and  $\beta 2$  and  $\alpha 2$  weakly with  $\alpha 4$ . Some of the patterns of expression  
469 are consistent with previously published pharmacological studies that tested for co-  
470 assembly of receptors by co-immunoprecipitation using  $\alpha$ -Bungarotoxin (Chamaon et  
471 al., 2002; Schulz et al., 2000). For example, cells that express the *nAChR- $\alpha 1$*  most  
472 frequently also express  $\alpha 2$ , when compared to all other nAChR subunits and these  
473 two subunits have been shown to preferentially co-assemble into the same receptor  
474 complex (Chamaon et al., 2002; Schulz et al., 2000). Similarly,  $\beta 1$  is the most  
475 frequently co-expressed subunit in  $\beta 2$  expressing cells, again confirming previous co-  
476 immunoprecipitation experiments. We also detected high expression levels of the  
477 secreted protein *quiver* (*qvr*), a Ly-6/neurotoxin family member, in most neurons of  
478 our sample (see Supplementary File 1). The mammalian homologue of quiver, *lynx1*,  
479 has been shown to bind and regulate nAChR in the mammalian nervous system  
480 (Miwa et al., 1999).

481

## 482 **Co-expression of activity regulated genes**

483 A recent study identified a set of genes whose expression was upregulated in  
484 response to prolonged neural activation. These activity-regulated genes (ARGs) were  
485 identified using differential bulk transcription profiling following broad neural  
486 activation, using three different artificial stimulation paradigms (Chen et al., 2016).  
487 We plotted the expression patterns of the 11 most highly upregulated genes that  
488 were identified following optogenetic neuronal activation, and found that 10 of them

489 were also robustly expressed in our dataset (see Supplementary file 1). Interestingly,  
490 the expression patterns of the most highly upregulated ARGs were strongly  
491 correlated (Fig 9). For example, cells that express the transcription factor *stripe* (*sr*)  
492 are more likely to also express *Hormone receptor-like in 38* (*Hr38*, p-value <  $2.2 \times 10^{-16}$ ,  
493 Pearson's product-moment correlation) and *CG14186* (p-value <  $2.2 \times 10^{-16}$ ). These  
494 three genes were the most highly upregulated in Chen et al. (2016), following artificial  
495 optogenetic neural stimulation. Our data therefore demonstrate that they are also  
496 likely to be co-regulated in the brain, following ordinary levels of neural activity.

497 We wondered whether the expression pattern of these ARGs might highlight areas of  
498 the fly midbrain that have a high intrinsic level of activity. However, no specific cluster  
499 was prominently marked with the expression of 9 out of the 10 ARGs tested. Only  
500 CG13055 strongly labeled the cluster of  $\gamma$  KCs (Fig. 2F and Supplementary file 2). In  
501 addition, we noticed that expression of most ARGs was slightly higher in  $\gamma$  KCs.  
502 Since prior work suggested that the  $\gamma$  neurons are the least active of all the KC  
503 subtypes (Tomchik and Davis, 2009), we speculate that ARG expression is a  
504 homeostatic neural response to reduce excitability.



## 505 Discussion

506 Generating an atlas of gene expression of every cell type in the human body is a goal  
507 of modern science (Regev et al., 2017). Remarkable recent advance in high-  
508 throughput single-cell RNA sequencing methods have brought this ambitious goal  
509 within reach. However, the large size of mammalian tissues means that huge  
510 numbers of cells need to be sequenced in order to capture a representative sample  
511 of the overall number. Insects, such as *Drosophila*, provide an obvious solution to the  
512 tissue size and cell number issues. Flies are complex organisms with tissues that  
513 serve analogous functions to many mammalian organs. Moreover, each one of these  
514 fly tissues is comprised of a greatly reduced number of cells, compared to their  
515 mammalian equivalent. This is perhaps most obvious when considering the brain.  
516 Whereas the mouse brain is considered to contain about 75 million neurons, the  
517 *Drosophila* brain has only 150,000. Since two thirds of these cells comprise the optic  
518 lobes, much of the computational cognitive power and behavioral orchestration is  
519 handled by about 50,000 neurons in the midbrain. In this study, we describe a global  
520 and unbiased single-cell transcriptomic analysis, using Drop-seq, that is  
521 representative of much of the *Drosophila* midbrain. This initial cell atlas of the fly  
522 brain provides a unique resource of gene expression across many cell types and  
523 regions of neuropil.

524 The extent of neural diversity is not known in any brain. Analysis of the fly therefore  
525 provides a useful inroad to this question. Even our initial clustering indicates a high  
526 level of neural complexity in the fly brain. Labeling the cluster plot with markers for  
527 the ACh, Glu and GABA NTs reveals that many diverse cells use each of these fast-  
528 acting NTs. For example, although the three major subsets of MB KCs are all  
529 cholinergic they each occupy a discrete cluster, and are distant to many other  
530 cholinergic neurons. The GABA-ergic ring neurons of the EB are similarly unique and  
531 distinct from other GABA-ergic neurons. At this stage, we cannot tell whether cells in  
532 the major KC subtype and EB neuron clusters are truly homogenous, or whether  
533 further iterative clustering will separate them into additional distinguishable subtypes.  
534 We might expect to find that the anatomically unique core, surface and posterior  
535 subdivisions of the  $\alpha\beta$  KCs have unique molecular profiles within the larger  $\alpha\beta$   
536 cluster. Similarly, the EB ring neurons might be separable into layer specific  
537 subtypes. This will require additional analyses and perhaps the collection of more  
538 cells. Comparing Drop-seq profiles from the fly brain to those from larger social  
539 insects, such as ants and honeybees, and to neurons from the mammalian brain

540 would be useful to address the question of how a larger brain is constructed. As a  
541 brain evolves to be bigger, are there many more cell types? Or is there simply an  
542 expansion of the number of copies of each cell-type? One might imagine that just  
543 expanding the number of identical cortical units, such as pyramidal neurons or MB  
544 KCs, increases the computational power of the brain by permitting a higher degree of  
545 parallel processing and that the resulting larger networks also provide more storage  
546 space.

547 A key element of our analysis here is the ability to assign many single-cell molecular  
548 signatures to the relevant cell-type and brain region. We did this using a number of  
549 different approaches. Our data was collected from individual neurons taken from  
550 brains that specifically express mCherry in the  $\alpha\beta$  KCs of the mushroom body. This  
551 allowed us to unequivocally identify these neurons in our cluster plot, and  
552 demonstrates the power of sequencing cells from a brain where some specific  
553 neurons are genetically labeled. In theory, this strategy can be used to identify the  
554 profiles for any *Drosophila* cell-type in a Drop-seq dataset, providing a corresponding  
555 specific GAL4 driver line is available. This is a clear advantage of using *Drosophila*  
556 as a model for a brain cell-atlas, because thousands of GAL4 lines are available that  
557 direct expression in specific subsets of neurons in the brain. Cell-specific transgene  
558 expression therefore presents the most straightforward means to link single-cell  
559 sequencing data to neuroanatomy and will be very useful to de-orphan our currently  
560 'unannotated' cells.

561 The extensive collection of cell-specific GAL4 lines were constructed by fusing  
562 potential regulatory regions from genes to GAL4 coding sequence. Their expression  
563 patterns can therefore indicate elements of the expression of the gene from which  
564 they are taken. We also used this property of the GAL4 collections to help us assign  
565 single-cell data to specific neurons. For example, we originally suspected that one of  
566 the clusters corresponded to EB ring neurons because cells in the cluster expressed  
567 the *Gad1* marker for GABA-ergic neurons and *Fas2*, an antibody for which is known  
568 to label this region of neuropil. To corroborate this assignment to EB we asked  
569 whether promoter-GAL4 lines constructed from some of the other top new markers  
570 for this cluster, such as *Dh31* and *Sox21b*, labeled EB ring neurons. Indeed, we  
571 found that the R20A02 (*Dh31*) and R73A06 (*Sox21b*) GAL4 drivers very specifically  
572 express in these neurons. Therefore, by combining the expression of known markers,  
573 and querying the specificity of new markers, it is possible to convincingly assign  
574 transcriptional profiles to cell-type.

575 Our initial analyses of the brain cell-atlas also immediately provided a lot of new  
576 information that is of functional importance. We focused our first investigations on  
577 neurotransmitter usage and the potential for synaptic co-release/co-transmission.  
578 These analyses clearly defined the main fast-acting transmitters used by each cell  
579 cluster. For example, the KC transmitter was fairly recently determined to be Ach  
580 (Barnstedt et al., 2016) and consequently all the KC clusters strongly labeled with the  
581 cholinergic markers *ChAT* and *VACHT*. The cell-atlas dataset therefore allows one to  
582 easily determine the neurotransmitters that a particular cell-type uses, providing the  
583 cells of interest can be identified in the cluster plot.

584 Important questions can also be addressed even without identifying how particular  
585 cells appear in the cluster plot. One example is our analyses of potential co-release  
586 of multiple fast acting transmitters or fast-acting transmitters with neuropeptides. Our  
587 data suggest that a small percentage of neurons might co-release ACh and Glu, or  
588 ACh and GABA. Analyzing co-expression of transmitter marker genes and  
589 neuropeptide-encoding genes revealed some very interesting and novel findings. We  
590 found that some neuropeptides, whether expressed in many or only a few cells, are  
591 exclusively detected in neurons that use a particular fast-acting transmitter. These  
592 correlations suggest a fine relationship between the fast-acting transmitter and  
593 neuropeptide-specific modulation. Our co-expression analyses also reveal extensive  
594 expression of neuropeptide-encoding and processing genes in monoaminergic  
595 neurons. It will be interesting to test whether the apparent heterogeneity of  
596 neuropeptide expression in these neurons contributes to their apparent functional  
597 specialization (Aso et al., 2012, 2014; Burke et al., 2012; Claridge-Chang et al.,  
598 2009; Huetteroth et al., 2015; Krashes et al., 2009; Lin et al., 2014; Liu et al., 2012;  
599 Yamagata et al., 2015).

600

601 The brain cell atlas is of great use to those with a gene-centered view of fly  
602 neurobiology. It is now possible to query the atlas and ask how broadly, or cell-  
603 specifically, a given gene is expressed. Our initial clustering allows one in some  
604 cases to pinpoint the expression to a defined cell-type and region of neuropil. This  
605 seems particularly valuable information if one is working with a gene, for example,  
606 one that has been implicated in neural disease, but does not know the anatomical  
607 context in which it operates. Similarly, if a constitutive mutant fly strain has pleiotropic  
608 effects, the expression pattern of the gene can indicate where the different  
609 phenotypes might manifest. Moreover, the brain-atlas dataset can provide these

610 answers quickly for multiple genes, and it therefore represents a terrific complement  
611 to the usual time-consuming and ‘single-gene at a time’ approaches, such as  
612 technically challenging *in-situ* hybridization to RNA, generating antibodies, making  
613 promoter fusions, or knocking in epitope tags to individual loci. Perhaps most  
614 importantly, querying the cell-atlas provides single-cell resolution of gene expression  
615 across all the major cell-types in the fly midbrain.

616

617 We believe that the potential uses for the cell atlas are almost endless. The data  
618 reveal a huge number of new genetic markers for known cell types, and as yet  
619 undefined cell types, in the fly brain. Many of these are likely to be functionally  
620 important and represent new entry points to guide interventionist experiments to  
621 understand how specific molecules operate within the relevant neurons and  
622 networks. Although we focused on neural cells, different classes of glia (Freeman,  
623 2015) could also be defined in the cluster.

624 Our initial analysis was performed on 10,286 of the highest quality cells ( $\geq 800$  UMIs)  
625 from a larger dataset of 19,260 cells. This atlas is effectively a scaffold that can now  
626 be continuously updated and expanded as additional cells are collected and  
627 sequenced. Our current dataset was derived from cells taken from unique groups of  
628 flies, processed on 8 separate days, and yet each biological replicate contributed  
629 equally to the combined data set. This robustness and reproducibility of the approach  
630 is essential to know in order to be able to add data from future experiments to the  
631 current cell cluster. Including more cells with a comparably high number of UMIs per  
632 cell should increase statistical power and permit further resolution of cell-type.  
633 Including more cells with a lower number of UMIs per cell did not improve our  
634 analysis.

635 The current dataset was collected from young flies that were raised under ideal  
636 conditions with ample food and water. Future experiments that aim to investigate the  
637 impact of changes to the state of the fly, such as age, bacterial infection and  
638 starvation, can use the current cell atlas as a foundation to identify changes in  
639 expression patterns that may occur in individual cells across the midbrain. Similarly,  
640 brains from flies harboring specific mutations can be molecularly characterized using  
641 the approach described here, to uncover molecular manifestations of the mutant  
642 phenotype.

643 The fly brain cell atlas described here should also be a valuable resource to  
644 researchers working in other animals. Many markers for *Drosophila* cell-type are  
645 likely to be conserved in other insects and arthropods, and so will be useful markers  
646 for regions of the brain in these animals (Thoen et al., 2017; Wolff and Strausfeld,  
647 2015). The orthologs of some of these new markers, for example those expressed in  
648 subsets of dopaminergic neurons, might also extend to labeling comparable cells in  
649 the mammalian brain.

## 650 **Materials and methods**

### 651 *Fly strains*

652 The *Drosophila* strains used were MB008B (Aso et al., 2014), R58E02 (Pfeiffer et al.,  
653 2008), *w-;+;20XUAS-6XGFP* (Shearin et al., 2014) and *w-; +; UAS-mCherry*. Flies  
654 were raised at 25°C in 12h:12h day-night cycles on standard food at 40-50%  
655 humidity.

656

### 657 *Cell culture*

658 S2 cells (Gibco, R69007) were grown in Schneider's medium (Gibco 21720-001)  
659 supplemented with 10% FBS (Sigma, F0804) & 1% penicillin-streptomycin (Gibco,  
660 15070-063). Sf9 cells (Gibco, 12659-017) were grown in Sf-900™ III SFM (Gibco,  
661 12658019). All cells were incubated at 25°C. Cells were grown in adherent cultures  
662 to confluency. Vessels were gently tapped to detach cells, and supernatants were  
663 centrifuged for 10 minutes at 100 x g. Cells were washed once with 1 x PBS and  
664 resuspended in 1 x PBS and subsequently diluted to 200 cells / ul prior to pooling  
665 and Drop-seq.

666

### 667 *Brain dissociation and cell collection*

668 The brain dissociation protocol was adapted from previously described methods  
669 (Harzer et al., 2013; Nagoshi et al., 2010). For each day of experiments, 80-100  
670 central brains were individually dissected in ice-cold calcium- and magnesium-free  
671 DPBS (Gibco, 14190-086) and immediately transferred into 1 mL toxin-supplemented  
672 Schneider's medium (tSM: Gibco, 21720-001 + 50 µM d(-)-2-amino-5-  
673 phosphonovaleric acid, 20 µM 6,7-dinitroquinoxaline-2,3-dione and 0.1 µM  
674 tetrodotoxin) on ice. Brains were washed once with 1 mL tSM and incubated in tSM  
675 containing 1.11 mg/mL papain (Sigma, P4762) and 1.11 mg/mL collagenase I  
676 (Sigma, C2674). Brains were washed once more with tSM and subsequently  
677 triturated with flame-rounded 200-µL pipette tips. Dissociated brains were  
678 resuspended into 1mL PBS + 0.01% BSA and filtered through a 10 µm CellTrix  
679 strainer (Sysmex, 04-0042-2314). Cell concentration was measured using a  
680 disposable Fuchs-Rosenthal hemocytometer (VWR, 631-1096) under a Leica DMIL  
681 LED Fluo microscope, that also allowed detecting mCherry fluorescence in

682 dissociated KCs. Cells were diluted in PBS + 0.01% BSA up to a concentration of  
683 200 cells/ $\mu$ L. Thus a typical preparation from 80 brains yielded ~2'000'000 single-  
684 cells in a volume of 10 mL.

685

#### 686 *Drop-seq procedure*

687 Drop-seq was performed as described (Macosko et al., 2015), using a Dolomite Bio  
688 (Royston, UK) Single Cell RNA-Seq system. Cells were diluted at a concentration of  
689 200 cells/ $\mu$ L into PBS + 0.01% BSA. Barcoded Beads SeqB (ChemGenes Corp.,  
690 Wilmington, MA, USA) were diluted at a concentration of 200 particles/ $\mu$ L into 200  
691 mM Tris pH 7.5, 6% Ficoll PM-400, 0.2% Sarkosyl, 20 mM EDTA + 50 mM DTT.

692 For each run, 700  $\mu$ L of cells solution from dissociated brains were loaded into a  
693 microcentrifuge tube inside a reservoir connected to a Mitos P-Pump (Dolomite  
694 microfluidics, 3200016) set to provide a constant flow of 30  $\mu$ L/min. The reservoir  
695 was placed on a stirring plate and agitation was provided by a stir bar placed inside  
696 the reservoir but outside the tube to maintain the cells in suspension while avoiding  
697 damaging the cells. 600  $\mu$ L of beads solution were loaded into a 50 cm sample loop  
698 connected to a second Mitos P-Pump set to provide a constant flow of 30  $\mu$ L/min.  
699 The sample loop was used to avoid beads sedimentation while eliminating the need  
700 for stirring, thus preventing beads damage. QX200 Droplet Generation Oil for  
701 EvaGreen (BioRad, 1864006) was loaded directly inside a third Mitos P-Pump, set to  
702 provide a constant flow of 200  $\mu$ L/min. Cells, beads and oil flows were connected to a  
703 Single Cell RNA Seq Droplet Chip (Dolomite Bio) according to manufacturer's  
704 instructions, allowing pairing of single-cells with single-beads and formation of 357  $\mu$ L  
705 droplets of aqueous cell/bead solution in oil. The chip was placed under a Meros  
706 High Speed Digital Microscope & Camera with a HLB M Plan Apo 5X objective in  
707 order to monitor droplet formation. Droplets were collected in 50 mL Falcon tubes.  
708 Reagents were reloaded and Falcon tubes replaced every 15 minutes.

709 Droplets were subsequently broken and beads with captured mRNA were washed as  
710 described (Macosko et al., 2015). In brief, bead-bound mRNA was immediately  
711 reverse-transcribed using a Template Switch Oligo (5' – AAG CAG TGG TAT CAA  
712 CGC AGA GTG AAT rGrGrG – 3') and Maxima H Minus Reverse Transcriptase  
713 (Thermo Scientific, EP0753). cDNA was treated with Exonuclease I (NEB, M0293L)  
714 and amplified in multiple 50  $\mu$ L PCR reactions performed on aliquots of ~2000 beads,

715 using a SMART PCR primer (5' – AAG CAG TGG TAT CAA CGC AGA GT – 3') and  
716 Hifi HotStart Readymix (Kapa Biosystems, KK2602) for a total of 17 cycles. 10 µL  
717 from each PCR reaction were pooled, and amplified cDNA was purified twice, with  
718 0.6X and 1.0X volumes of Agencourt AMPure XP beads (Beckman Coulter, A63880)  
719 and quantified on a Bioanalyzer, using a High-Sensitivity DNA kit (Agilent, 5067-  
720 4626). From each sample, 2 x 600 pg of amplified cDNA were tagmented using the  
721 Nextera XT DNA Sample Preparation Kit (Illumina, FC-131-1024) with New-P5-  
722 SMART PCR hybrid (5' – AAT GAT ACG GCG ACC ACC GAG ATC TAC ACG CCT  
723 GTC CGC GGA AGC AGT GGT ATC AAC GCA GAG T\*A\*C – 3') and one of  
724 Nextera N701 to N706 oligos. cDNA libraries were purified twice, with 0.6X and 1.0X  
725 volumes of Agencourt AMPure XP beads (Beckman Coulter, A63880) and quantified  
726 on a Bioanalyzer, using a High-Sensitivity DNA kit (Agilent, 5067-4626). Libraries  
727 were pooled together and sequenced on an Illumina HiSeq2500 sequencer using a  
728 Custom Read1 primer (5' – GCC TGT CCG CGG AAG CAG TGG TAT CAA CGC  
729 AGA GTA C – 3') and standard Illumina Read2 primers. All oligos were synthesized  
730 by Sigma, and HPLC purified. Samples from days 1 and 2 were sequenced together,  
731 on two separate lanes. Samples from days 3-8 were sequenced together, on three  
732 separate lanes.

733

#### 734 *Data processing and alignment*

735 Sequencing data was processed as previously described (Macosko et al., 2015;  
736 Satija et al., 2015), following the Drop-seq Computational Protocol v.1.0.1 and using  
737 the Drop-seq software tools v.1.13 from the McCarroll lab. Barcodes were extracted  
738 and reads were aligned to a combination of the *Drosophila melanogaster* genome  
739 release 6.13 (from Flybase.org) and three reference sequences for mCherry and  
740 each split-Gal4 transgenes of the flies that were used in this study. For the species  
741 mix experiments, reads were also aligned to the *Spodoptera frugiperda* genome  
742 (Kakumani et al., 2014), available at NCBI GenBank, assembly ASM221328v1. The  
743 Flybase v.FB2016\_05 September gene names were used for the creation of the  
744 Digital Gene Expression (DGE) Matrix.

745

#### 746 *t-SNE analysis on whole brain data*



747 Analysis of DGEs was performed with the Seurat 2.1.0 R package (Macosko et al.,  
748 2015; Satija et al., 2015). Cells with less than 200 genes were discarded. Several  
749 thresholds for the number of UMIs per cell were tested (see Fig. 1 - figure  
750 supplement 2). All results presented here are based on 800 and 10,000 UMIs per cell  
751 as lower and higher threshold, respectively. Data was log-normalized and scaled  
752 using default options. Variation driven by individual batches was regressed out from  
753 the normalized, scaled data. PCA analysis was performed on the data as previously  
754 described (Macosko et al., 2015). To visualize the data, spectral t-SNE  
755 dimensionality reduction was performed, using the first 50 PCAs, as instructed by a  
756 Jack Straw resampling test (Satija et al., 2015; Van Der Maaten, 2014). Clusters  
757 were identified by a shared nearest neighbor modularity optimization (Waltman and  
758 Eck, 2013), using a resolution of 2.5. Some of these clusters were subsequently  
759 manually modified (compare Fig. 1 - figure supplement 2B (unmodified) and Fig. 1B  
760 (modified)). Main markers for each identified cluster were identified as genes with  
761  $\text{Log}_2 \text{FC} \geq 1$  and a p-value of  $p < 0.01$  (after Bonferroni correction).

762

#### 763 *Co-expression analysis*

764 Gene co-expression was assessed by calculating the Pearson product-moment  
765 correlation of the log-normalized, scaled expression values using R. For the radar  
766 plots, the number of cells expressing each neuropeptide of interest and in addition  
767 either *VACht* (to identify cholinergic cells), *VGlut* (glutamatergic), *Gad1* (GABA-ergic)  
768 or combinations of the three were calculated and normalized to the total number of  
769 cells expressing each NT.

770

#### 771 *t-SNE analysis on PNs and monoaminergic neurons (re-clustering)*

772 DGE columns corresponding to cells belonging to either PN or monoaminergic  
773 clusters were used for PCA analyses. For re-clustering of monoaminergic neurons, a  
774 selection of known markers (*ple*, *DAT*, *SerT*, *Trh*, *Vmat*, *Oamb*, *Ddc*, *Tdc2* and *Tbh*)  
775 was used as input for PCA analysis. In both cases, the first 6 PCAs were used for re-  
776 clustering, which was performed as above.

777

#### 778 *RNA-sequencing of PAM-DA neurons*

779 Central brains from flies expressing a brighter, hexameric GFP (20xUAS-6xGFP;  
780 Shearin et al., 2014) specifically in PAM-DA neurons under the control of the R58E02  
781 Gal4 line (Pfeiffer et al., 2008) were dissected and dissociated as above. Filtered  
782 cells were sorted with a MoFlo Astrios (Beckman Coulter), and both GFP+ and GFP-  
783 cells were collected. Cells were lysed, retro-transcribed and amplified (17 cycles)  
784 using the SMART-Seq v4 Ultra Low Input RNA Kit for Sequencing (Takara Clontech,  
785 634890), according to manufacturer's instructions. Technical triplicates were made  
786 for each sample. cDNA libraries were generated with TruSeq RNA Library Prep Kit  
787 v2 (Illumina, RS-122-2001) and sequenced on an Illumina HiSeq4000 sequencer.

788

### 789 **Acknowledgements**

790 We thank the Bloomington Stock Center for flies. We are grateful to Michal Maj for  
791 help with FACS, Paola Cognigni for help with R and statistics, and other members of  
792 the Waddell lab for discussion. RNA-sequencing was performed at MacroGen Inc.  
793 and the Oxford Genomic Centre. CT was supported by a Wellcome Trust PhD  
794 studentship and SW is funded by a Wellcome Trust Principal Research Fellowship in  
795 the Basic Biomedical Sciences (200846/Z/16/Z) and the Bettencourt-Schueller  
796 Foundation.

797

### 798 **Competing interests**

799 The authors declare that no competing interests exist.

800

### 801 **References**

- 802 Abrieux, A., Duportets, L., Debernard, S., Gadenne, C., and Anton, S. (2014). The  
803 GPCR membrane receptor, DopEcR, mediates the actions of both dopamine and  
804 ecdysone to control sex pheromone perception in an insect. *Front. Behav. Neurosci.*  
805 *8*.
- 806 Albuquerque, E.X., Pereira, E.F.R., Alkondon, M., and Rogers, S.W. (2009).  
807 Mammalian nicotinic acetylcholine receptors: from structure to function. *Physiol. Rev.*  
808 *89*, 73–120.
- 809 Aranda, G.P., Hinojos, S.J., Sabandal, P.R., Evans, P.D., and Han, K.-A. (2017).  
810 Behavioral Sensitization to the Disinhibition Effect of Ethanol Requires the  
811 Dopamine/Ecdysone Receptor in *Drosophila*. *Front. Syst. Neurosci.* *11*.

- 812 Aso, Y., Herb, A., Ogueta, M., Siwanowicz, I., Templier, T., Friedrich, A.B., Ito, K.,  
813 Scholz, H., and Tanimoto, H. (2012). Three dopamine pathways induce aversive  
814 odor memories with different stability. *PLoS Genet.* 8, e1002768.
- 815 Aso, Y., Hattori, D., Yu, Y., Johnston, R.M., Iyer, N.A., Ngo, T.-T.B., Dionne, H.,  
816 Abbott, L.F., Axel, R., Tanimoto, H., et al. (2014). The neuronal architecture of the  
817 mushroom body provides a logic for associative learning. *ELife* 3, e04577.
- 818 Awasaki, T., Saito, M., Sone, M., Suzuki, E., Sakai, R., Ito, K., and Hama, C. (2000).  
819 The *Drosophila* trio plays an essential role in patterning of axons by regulating their  
820 directional extension. *Neuron* 26, 119–131.
- 821 Ayala-Lopez, N., Martini, M., Jackson, W.F., Darios, E., Burnett, R., Seitz, B., Fink,  
822 G.D., and Watts, S.W. (2014). Perivascular adipose tissue contains functional  
823 catecholamines. *Pharmacol. Res. Perspect.* 2.
- 824 Barnstedt, O., Oswald, D., Felsenberg, J., Brain, R., Moszynski, J.-P., Talbot, C.B.,  
825 Perrat, P.N., and Waddell, S. (2016). Memory-Relevant Mushroom Body Output  
826 Synapses Are Cholinergic. *Neuron* 89, 1237–1247.
- 827 de Belle, J.S., and Heisenberg, M. (1994). Associative odor learning in *Drosophila*  
828 abolished by chemical ablation of mushroom bodies. *Science* 263, 692–695.
- 829 Berck, M.E., Khandelwal, A., Claus, L., Hernandez-Nunez, L., Si, G., Tabone, C.J.,  
830 Li, F., Truman, J.W., Fetter, R.D., Louis, M., et al. (2016). The wiring diagram of a  
831 glomerular olfactory system. *ELife* 5.
- 832 Bjorum, S.M., Simonette, R.A., Alanis, R., Wang, J.E., Lewis, B.M., Trejo, M.H.,  
833 Hanson, K.A., and Beckingham, K.M. (2013). The *Drosophila* BTB domain protein  
834 Jim Lovell has roles in multiple larval and adult behaviors. *PLoS One* 8, e61270.
- 835 Borycz, J., Borycz, J.A., Loubani, M., and Meinertzhagen, I.A. (2002). tan and ebony  
836 Genes Regulate a Novel Pathway for Transmitter Metabolism at Fly Photoreceptor  
837 Terminals. *J. Neurosci.* 22, 10549–10557.
- 838 Bouzaiane, E., Trannoy, S., Scheunemann, L., Plaçais, P.-Y., and Preat, T. (2015).  
839 Two independent mushroom body output circuits retrieve the six discrete  
840 components of *Drosophila* aversive memory. *Cell Rep.* 11, 1280–1292.
- 841 Brogiolo, W., Stocker, H., Ikeya, T., Rintelen, F., Fernandez, R., and Hafen, E.  
842 (2001). An evolutionarily conserved function of the *Drosophila* insulin receptor and  
843 insulin-like peptides in growth control. *Curr. Biol.* CB 11, 213–221.
- 844 Burke, C.J., Huetteroth, W., Oswald, D., Perisse, E., Krashes, M.J., Das, G., Gohl, D.,  
845 Silies, M., Certel, S., and Waddell, S. (2012). Layered reward signalling through  
846 octopamine and dopamine in *Drosophila*. *Nature* 492, 433–437.
- 847 Chamaon, K., Smalla, K.-H., Thomas, U., and Gundelfinger, E.D. (2002). Nicotinic  
848 acetylcholine receptors of *Drosophila*: three subunits encoded by genomically linked  
849 genes can co-assemble into the same receptor complex. *J. Neurochem.* 80, 149–  
850 157.
- 851 Chen, X., Rahman, R., Guo, F., and Rosbash, M. (2016). Genome-wide identification  
852 of neuronal activity-regulated genes in *Drosophila*. *ELife* 5.

- 853 Cheng, Y., Endo, K., Wu, K., Rodan, A.R., Heberlein, U., and Davis, R.L. (2001).  
854 *Drosophila fasciclinII* Is Required for the Formation of Odor Memories and for Normal  
855 Sensitivity to Alcohol. *Cell* 105, 757–768.
- 856 Claridge-Chang, A., Roorda, R.D., Vrontou, E., Sjulson, L., Li, H., Hirsh, J., and  
857 Miesenböck, G. (2009). Writing memories with light-addressable reinforcement  
858 circuitry. *Cell* 139, 405–415.
- 859 Cognigni, P., Felsenberg, J., and Waddell, S. (2018). Do the right thing: neural  
860 network mechanisms of memory formation, expression and update in *Drosophila*.  
861 *Curr. Opin. Neurobiol.* 49, 51–58.
- 862 Crittenden, J.R., Skoulakis, E.M., Han, K.A., Kalderon, D., and Davis, R.L. (1998).  
863 Tripartite mushroom body architecture revealed by antigenic markers. *Learn. Mem.*  
864 *Cold Spring Harb. N* 5, 38–51.
- 865 Das, G., Klappenbach, M., Vrontou, E., Perisse, E., Clark, C.M., Burke, C.J., and  
866 Waddell, S. (2014). *Drosophila* learn opposing components of a compound food  
867 stimulus. *Curr. Biol. CB* 24, 1723–1730.
- 868 Dib, P.B., Gnägi, B., Daly, F., Sabado, V., Tas, D., Glauser, D.A., Meister, P., and  
869 Nagoshi, E. (2014). A Conserved Role for p48 Homologs in Protecting Dopaminergic  
870 Neurons from Oxidative Stress. *PLOS Genet.* 10, e1004718.
- 871 Eichler, K., Li, F., Litwin-Kumar, A., Park, Y., Andrade, I., Schneider-Mizell, C.M.,  
872 Saumweber, T., Huser, A., Eschbach, C., Gerber, B., et al. (2017). The complete  
873 connectome of a learning and memory centre in an insect brain. *Nature* 548, 175–  
874 182.
- 875 Freeman, M.R. (2015). *Drosophila* Central Nervous System Glia. *Cold Spring Harb.*  
876 *Perspect. Biol.* 7.
- 877 Galili, D.S., Dylla, K.V., Lüdke, A., Friedrich, A.B., Yamagata, N., Wong, J.Y.H., Ho,  
878 C.H., Szyszka, P., and Tanimoto, H. (2014). Converging circuits mediate temperature  
879 and shock aversive olfactory conditioning in *Drosophila*. *Curr. Biol. CB* 24, 1712–  
880 1722.
- 881 Geng, C., and Macdonald, P.M. (2006). Imp associates with squid and Hrp48 and  
882 contributes to localized expression of gurken in the oocyte. *Mol. Cell. Biol.* 26, 9508–  
883 9516.
- 884 Ghiglione, C., Carraway, K.L., Amundadottir, L.T., Boswell, R.E., Perrimon, N., and  
885 Duffy, J.B. (1999). The transmembrane molecule kekkon 1 acts in a feedback loop to  
886 negatively regulate the activity of the *Drosophila* EGF receptor during oogenesis. *Cell*  
887 96, 847–856.
- 888 Haberkern, H., and Jayaraman, V. (2016). Studying small brains to understand the  
889 building blocks of cognition. *Curr. Opin. Neurobiol.* 37, 59–65.
- 890 Han, K.-A., Millar, N.S., Grotewiel, M.S., and Davis, R.L. (1996). DAMB, a Novel  
891 Dopamine Receptor Expressed Specifically in *Drosophila* Mushroom Bodies. *Neuron*  
892 16, 1127–1135.

- 893 Han, M., Park, D., Vanderzalm, P.J., Mains, R.E., Eipper, B.A., and Taghert, P.H.  
894 (2004). *Drosophila* uses two distinct neuropeptide amidating enzymes, dPAL1 and  
895 dPAL2. *J. Neurochem.* *90*, 129–141.
- 896 Harzer, H., Berger, C., Conder, R., Schmauss, G., and Knoblich, J.A. (2013). FACS  
897 purification of *Drosophila* larval neuroblasts for next-generation sequencing. *Nat.*  
898 *Protoc.* *8*, 1088–1099.
- 899 Heisenberg, M. (2003). Mushroom body memoir: from maps to models. *Nat. Rev.*  
900 *Neurosci.* *4*, 266–275.
- 901 Hovemann, B.T., Ryseck, R.P., Walldorf, U., Störtkuhl, K.F., Dietzel, I.D., and  
902 Dessen, E. (1998). The *Drosophila* ebony gene is closely related to microbial peptide  
903 synthetases and shows specific cuticle and nervous system expression. *Gene* *221*,  
904 1–9.
- 905 Huetteroth, W., Perisse, E., Lin, S., Klappenbach, M., Burke, C., and Waddell, S.  
906 (2015). Sweet taste and nutrient value subdivide rewarding dopaminergic neurons in  
907 *Drosophila*. *Curr. Biol.* *CB 25*, 751–758.
- 908 Ichinose, T., Aso, Y., Yamagata, N., Abe, A., Rubin, G.M., and Tanimoto, H. (2015).  
909 Reward signal in a recurrent circuit drives appetitive long-term memory formation.  
910 *ELife* *4*, e10719.
- 911 Ignell, R., Root, C.M., Birse, R.T., Wang, J.W., Nässel, D.R., and Winther, Å.M.E.  
912 (2009). Presynaptic peptidergic modulation of olfactory receptor neurons in  
913 *Drosophila*. *Proc. Natl. Acad. Sci. U. S. A.* *106*, 13070–13075.
- 914 Jiang, N., Kolhekar, A.S., Jacobs, P.S., Mains, R.E., Eipper, B.A., and Taghert, P.H.  
915 (2000). PHM is required for normal developmental transitions and for biosynthesis of  
916 secretory peptides in *Drosophila*. *Dev. Biol.* *226*, 118–136.
- 917 Jinushi-Nakao, S., Arvind, R., Amikura, R., Kinameri, E., Liu, A.W., and Moore, A.W.  
918 (2007). Knot/Collier and Cut Control Different Aspects of Dendrite Cytoskeleton and  
919 Synergize to Define Final Arbor Shape. *Neuron* *56*, 963–978.
- 920 Johard, H.A.D., Enell, L.E., Gustafsson, E., Trifilieff, P., Veenstra, J.A., and Nässel,  
921 D.R. (2008). Intrinsic neurons of *Drosophila* mushroom bodies express short  
922 neuropeptide F: relations to extrinsic neurons expressing different neurotransmitters.  
923 *J. Comp. Neurol.* *507*, 1479–1496.
- 924 Kahsai, L., Carlsson, M.A., Winther, A.M.E., and Nässel, D.R. (2012). Distribution of  
925 metabotropic receptors of serotonin, dopamine, GABA, glutamate, and short  
926 neuropeptide F in the central complex of *Drosophila*. *Neuroscience* *208*, 11–26.
- 927 Kakumani, P.K., Malhotra, P., Mukherjee, S.K., and Bhatnagar, R.K. (2014). A draft  
928 genome assembly of the army worm, *Spodoptera frugiperda*. *Genomics* *104*, 134–  
929 143.
- 930 Kelley, R.L., and Kuroda, M.I. (2003). The *Drosophila* roX1 RNA gene can overcome  
931 silent chromatin by recruiting the male-specific lethal dosage compensation complex.  
932 *Genetics* *164*, 565–574.
- 933 Kolhekar, A.S., Roberts, M.S., Jiang, N., Johnson, R.C., Mains, R.E., Eipper, B.A.,  
934 and Taghert, P.H. (1997). Neuropeptide amidation in *Drosophila*: separate genes

- 935 encode the two enzymes catalyzing amidation. *J. Neurosci. Off. J. Soc. Neurosci.* *17*,  
936 1363–1376.
- 937 Komiyama, T., and Luo, L. (2007). Intrinsic control of precise dendritic targeting by an  
938 ensemble of transcription factors. *Curr. Biol. CB* *17*, 278–285.
- 939 Komiyama, T., Johnson, W.A., Luo, L., and Jefferis, G.S.X.E. (2003). From lineage to  
940 wiring specificity. POU domain transcription factors control precise connections of  
941 *Drosophila* olfactory projection neurons. *Cell* *112*, 157–167.
- 942 Krashes, M.J., DasGupta, S., Vreede, A., White, B., Armstrong, J.D., and Waddell, S.  
943 (2009). A neural circuit mechanism integrating motivational state with memory  
944 expression in *Drosophila*. *Cell* *139*, 416–427.
- 945 Kurusu, M., Nagao, T., Walldorf, U., Flister, S., Gehring, W.J., and Furukubo-  
946 Tokunaga, K. (2000). Genetic control of development of the mushroom bodies, the  
947 associative learning centers in the *Drosophila* brain, by the *eyeless*, twin of *eyeless*,  
948 and *Dachshund* genes. *Proc. Natl. Acad. Sci. U. S. A.* *97*, 2140–2144.
- 949 Lai, S.-L., Awasaki, T., Ito, K., and Lee, T. (2008). Clonal analysis of *Drosophila*  
950 antennal lobe neurons: diverse neuronal architectures in the lateral neuroblast  
951 lineage. *Development* *135*, 2883–2893.
- 952 Lebestky, T., Chang, J.-S.C., Dankert, H., Zelnik, L., Kim, Y.-C., Han, K.-A., Wolf,  
953 F.W., Perona, P., and Anderson, D.J. (2009). Two different forms of arousal in  
954 *Drosophila* are oppositely regulated by the dopamine D1 receptor ortholog DopR via  
955 distinct neural circuits. *Neuron* *64*, 522–536.
- 956 Li, H., Horns, F., Wu, B., Xie, Q., Li, J., Li, T., Luginbuhl, D.J., Quake, S.R., and Luo,  
957 L. (2017). Classifying *Drosophila* Olfactory Projection Neuron Subtypes by Single-  
958 Cell RNA Sequencing. *Cell* *171*, 1206–1220.e22.
- 959 Lin, S., Oswald, D., Chandra, V., Talbot, C., Huetteroth, W., and Waddell, S. (2014).  
960 Neural correlates of water reward in thirsty *Drosophila*. *Nat. Neurosci.* *17*, 1536–  
961 1542.
- 962 Liu, C., Plaçais, P.-Y., Yamagata, N., Pfeiffer, B.D., Aso, Y., Friedrich, A.B.,  
963 Siwanowicz, I., Rubin, G.M., Preat, T., and Tanimoto, H. (2012). A subset of  
964 dopamine neurons signals reward for odour memory in *Drosophila*. *Nature* *488*, 512–  
965 516.
- 966 Macosko, E.Z., Basu, A., Satija, R., Nemes, J., Shekhar, K., Goldman, M., Tirosh, I.,  
967 Bialas, A.R., Kamitaki, N., Martersteck, E.M., et al. (2015). Highly Parallel Genome-  
968 wide Expression Profiling of Individual Cells Using Nanoliter Droplets. *Cell* *161*,  
969 1202–1214.
- 970 Martin, C.A., and Krantz, D.E. (2014). *Drosophila melanogaster* as a genetic model  
971 system to study neurotransmitter transporters. *Neurochem. Int.* *73*, 71–88.
- 972 Miwa, J.M., Ibanez-Tallon, I., Crabtree, G.W., Sánchez, R., Sali, A., Role, L.W., and  
973 Heintz, N. (1999). *lynx1*, an endogenous toxin-like modulator of nicotinic  
974 acetylcholine receptors in the mammalian CNS. *Neuron* *23*, 105–114.

- 975 Munro, T.P., Kwon, S., Schnapp, B.J., and St Johnston, D. (2006). A repeated IMP-  
976 binding motif controls oskar mRNA translation and anchoring independently of  
977 *Drosophila melanogaster* IMP. *J. Cell Biol.* *172*, 577–588.
- 978 Nagoshi, E., Sugino, K., Kula, E., Okazaki, E., Tachibana, T., Nelson, S., and  
979 Rosbash, M. (2010). Dissecting differential gene expression within the circadian  
980 neuronal circuit of *Drosophila*. *Nat. Neurosci.* *13*, 60–68.
- 981 Nakayama, M., Matsushita, F., and Hama, C. (2014). The Matrix Protein Hikaru genki  
982 Localizes to Cholinergic Synaptic Clefts and Regulates Postsynaptic Organization in  
983 the *Drosophila* Brain. *J. Neurosci.* *34*, 13872–13877.
- 984 Nakayama, M., Suzuki, E., Tsunoda, S., and Hama, C. (2016). The Matrix Proteins  
985 Hasp and Hig Exhibit Segregated Distribution within Synaptic Clefts and Play Distinct  
986 Roles in Synaptogenesis. *J. Neurosci.* *36*, 590–606.
- 987 Nall, A.H., Shakhmantsir, I., Cichewicz, K., Birman, S., Hirsh, J., and Sehgal, A.  
988 (2016). Caffeine promotes wakefulness via dopamine signaling in *Drosophila*. *Sci.*  
989 *Rep.* *6*, 20938.
- 990 Nässel, D.R., Enell, L.E., Santos, J.G., Wegener, C., and Johard, H.A. (2008). A  
991 large population of diverse neurons in the *Drosophila* central nervous system  
992 expresses short neuropeptide F, suggesting multiple distributed peptide functions.  
993 *BMC Neurosci.* *9*, 90.
- 994 Ohyama, T., Schneider-Mizell, C.M., Fetter, R.D., Aleman, J.V., Franconville, R.,  
995 Rivera-Alba, M., Mensh, B.D., Branson, K.M., Simpson, J.H., Truman, J.W., et al.  
996 (2015). A multilevel multimodal circuit enhances action selection in *Drosophila*.  
997 *Nature* *520*, 633–639.
- 998 Okamoto, N., Yamanaka, N., Yagi, Y., Nishida, Y., Kataoka, H., O'Connor, M.B., and  
999 Mizoguchi, A. (2009). A fat body-derived IGF-like peptide regulates postfeeding  
1000 growth in *Drosophila*. *Dev. Cell* *17*, 885–891.
- 1001 Perisse, E., Yin, Y., Lin, A.C., Lin, S., Huetteroth, W., and Waddell, S. (2013).  
1002 Different kenyon cell populations drive learned approach and avoidance in  
1003 *Drosophila*. *Neuron* *79*, 945–956.
- 1004 Pfeiffer, B.D., Jenett, A., Hammonds, A.S., Ngo, T.-T.B., Misra, S., Murphy, C.,  
1005 Scully, A., Carlson, J.W., Wan, K.H., Lavery, T.R., et al. (2008). Tools for  
1006 neuroanatomy and neurogenetics in *Drosophila*. *Proc. Natl. Acad. Sci. U. S. A.* *105*,  
1007 9715–9720.
- 1008 Regev, A., Teichmann, S.A., Lander, E.S., Amit, I., Benoist, C., Birney, E.,  
1009 Bodenmiller, B., Campbell, P.J., Carninci, P., Clatworthy, M., et al. (2017). Science  
1010 Forum: The Human Cell Atlas. *ELife* *6*, e27041.
- 1011 Satija, R., Farrell, J.A., Gennert, D., Schier, A.F., and Regev, A. (2015). Spatial  
1012 reconstruction of single-cell gene expression data. *Nat. Biotechnol.* *33*, 495–502.
- 1013 Sattelle, D.B., Jones, A.K., Sattelle, B.M., Matsuda, K., Reenan, R., and Biggin, P.C.  
1014 (2005). Edit, cut and paste in the nicotinic acetylcholine receptor gene family of  
1015 *Drosophila melanogaster*. *BioEssays News Rev. Mol. Cell. Dev. Biol.* *27*, 366–376.

- 1016 Schulz, R., Bertrand, S., Chamaon, K., Smalla, K.-H., Gundelfinger, E.D., and  
1017 Bertrand, D. (2000). Neuronal Nicotinic Acetylcholine Receptors from *Drosophila*. *J.*  
1018 *Neurochem.* *74*, 2537–2546.
- 1019 Seelig, J.D., and Jayaraman, V. (2015). Neural dynamics for landmark orientation  
1020 and angular path integration. *Nature* *521*, 186–191.
- 1021 Shearin, H.K., Macdonald, I.S., Spector, L.P., and Stowers, R.S. (2014). Hexameric  
1022 GFP and mCherry reporters for the *Drosophila* GAL4, Q, and LexA transcription  
1023 systems. *Genetics* *196*, 951–960.
- 1024 Suh, J., and Jackson, F.R. (2007). *Drosophila* ebony activity is required in glia for the  
1025 circadian regulation of locomotor activity. *Neuron* *55*, 435–447.
- 1026 Takemura, S., Bharioke, A., Lu, Z., Nern, A., Vitaladevuni, S., Rivlin, P.K., Katz,  
1027 W.T., Olbris, D.J., Plaza, S.M., Winston, P., et al. (2013). A visual motion detection  
1028 circuit suggested by *Drosophila* connectomics. *Nature* *500*, 175–181.
- 1029 Takemura, S.-Y., Aso, Y., Hige, T., Wong, A., Lu, Z., Xu, C.S., Rivlin, P.K., Hess, H.,  
1030 Zhao, T., Parag, T., et al. (2017a). A connectome of a learning and memory center in  
1031 the adult *Drosophila* brain. *ELife* *6*.
- 1032 Takemura, S.-Y., Nern, A., Chklovskii, D.B., Scheffer, L.K., Rubin, G.M., and  
1033 Meinertzhagen, I.A. (2017b). The comprehensive connectome of a neural substrate  
1034 for “ON” motion detection in *Drosophila*. *ELife* *6*.
- 1035 Tanaka, N.K., Endo, K., and Ito, K. (2012). Organization of antennal lobe-associated  
1036 neurons in adult *Drosophila melanogaster* brain. *J. Comp. Neurol.* *520*, 4067–4130.
- 1037 Thoen, H.H., Marshall, J., Wolff, G.H., and Strausfeld, N.J. (2017). Insect-Like  
1038 Organization of the Stomatopod Central Complex: Functional and Phylogenetic  
1039 Implications. *Front. Behav. Neurosci.* *11*, 12.
- 1040 Tobin, W.F., Wilson, R.I., and Lee, W.-C.A. (2017). Wiring variations that enable and  
1041 constrain neural computation in a sensory microcircuit. *ELife* *6*.
- 1042 Tomchik, S.M., and Davis, R.L. (2009). Dynamics of learning-related cAMP signaling  
1043 and stimulus integration in the *Drosophila* olfactory pathway. *Neuron* *64*, 510–521.
- 1044 Treiber, C.D., and Waddell, S. (2017). Resolving the prevalence of somatic  
1045 transposition in *Drosophila*. *ELife* *6*, e28297.
- 1046 True, J.R., Yeh, S.-D., Hovemann, B.T., Kemme, T., Meinertzhagen, I.A., Edwards,  
1047 T.N., Liou, S.-R., Han, Q., and Li, J. (2005). *Drosophila tan* Encodes a Novel  
1048 Hydrolase Required in Pigmentation and Vision. *PLOS Genet.* *1*, e63.
- 1049 Van Der Maaten, L. (2014). Accelerating t-SNE Using Tree-based Algorithms. *J*  
1050 *Mach Learn Res* *15*, 3221–3245.
- 1051 Waltman, L., and Eck, N.J. van (2013). A smart local moving algorithm for large-scale  
1052 modularity-based community detection. *Eur. Phys. J. B* *86*, 471.
- 1053 Wolff, G.H., and Strausfeld, N.J. (2015). Genealogical correspondence of mushroom  
1054 bodies across invertebrate phyla. *Curr. Biol. CB* *25*, 38–44.



- 1055 Yamagata, N., Ichinose, T., Aso, Y., Plaçais, P.-Y., Friedrich, A.B., Sima, R.J., Preat,  
1056 T., Rubin, G.M., and Tanimoto, H. (2015). Distinct dopamine neurons mediate reward  
1057 signals for short- and long-term memories. *Proc. Natl. Acad. Sci. U. S. A.* *112*, 578–  
1058 583.
- 1059 Yamamoto, S., and Seto, E.S. (2014). Dopamine dynamics and signaling in  
1060 *Drosophila*: an overview of genes, drugs and behavioral paradigms. *Exp. Anim.* *63*,  
1061 107–119.
- 1062 Zheng, Z., Lauritzen, J.S., Perlman, E., Robinson, C.G., Nichols, M., Milkie, D.,  
1063 Torrens, O., Price, J., Fisher, C.B., Sharifi, N., et al. (2017). A Complete Electron  
1064 Microscopy Volume Of The Brain Of Adult *Drosophila melanogaster*. *BioRxiv*  
1065 140905.
- 1066 Ziegenhain, C., Vieth, B., Parekh, S., Reinius, B., Guillaumet-Adkins, A., Smets, M.,  
1067 Leonhardt, H., Heyn, H., Hellmann, I., and Enard, W. (2017). Comparative Analysis  
1068 of Single-Cell RNA Sequencing Methods. *Mol. Cell* *65*, 631–643.e4.
- 1069

1070 **Figure legends**

1071 **Figure 1 – Drop-seq reveals neuronal clusters in the *Drosophila* brain. (A)**

1072 Schematic of the experimental procedure. *Drosophila* brains were dissected and  
1073 dissociated prior to Drop-seq. After sequencing and alignment, a digital expression  
1074 matrix containing information about the number of UMIs found for each gene, in each  
1075 cell, was generated and used for PCA and subsequent analyses. See Methods  
1076 section for details. **(B)** Two-dimensional representation (t-SNE) of 10,286 *Drosophila*  
1077 brain cells, manually classified into 28 clusters. Based on the recovery of cell-types of  
1078 known abundance in the brain, we estimate that there are 45,000 cells in the fly  
1079 midbrain.

1080 **Figure 2 – Identification of Kenyon Cells and mushroom body-specific genes.**

1081 **(A)** mCherry labeling of MB008B neurons in the *Drosophila* brain. Neuropils, labeled  
1082 by nc82 anti-Brp antibody, are shown in grey. **(B)** Expression of mCherry in the t-  
1083 SNE-clustered brain cells shown in Figure 1B. mCherry-positive cells are labeled in  
1084 red and represent  $\alpha\beta$  Kenyon Cells (KCs). Intensity of red (or other colors in the  
1085 panels below) is proportional to the normalized expression level. **(C)** and **(D)**  
1086 Expression of *eyeless* and *Dop1R2* (*damb*), in t-SNE-clustered brain cells. The three  
1087 numbered clusters containing blue-labeled cells are KCs. **(E)** Expression of *sNPF*,  
1088 *Fas2* and *trio* in the three t-SNE clusters numbered in (C) and (D). Cells in light blue,  
1089 orange and purple express each of these genes in  $\alpha\beta$ ,  $\gamma$ , and  $\alpha'\beta'$  KCs, respectively.  
1090 *sNPF* and *Fas2* are mostly expressed in  $\alpha\beta$  and  $\gamma$  KCs, while *trio* is mostly expressed  
1091 in  $\gamma$  and  $\alpha'\beta'$  KCs. **(F)** Violin plots showing the main markers that distinguish KC  
1092 subtypes of KCs from each other (pairwise comparisons for genes expressed in >  
1093 50% of cells in either cluster; Log<sub>2</sub> FC > 1.5, Wilcoxon rank-sum test with Bonferroni-  
1094 corrected p-value < 0.01). The right hand column indicates expression of these  
1095 genes in non-MB neurons.

1096 **Figure 3 – Sub-populations of olfactory projection neurons. (A)** Re-clustering of

1097 the two Projection Neuron (PN) clusters from Figure 1B. Clusters are color-coded.  
1098 **(B)** Dot plots showing the main markers distinguishing PN populations from each  
1099 other (pairwise comparisons for genes expressed in > 50% of cells in either cluster;  
1100 Log<sub>2</sub> FC > 1.5, Wilcoxon rank-sum test with Bonferroni-corrected p-value < 0.01).  
1101 Dot diameter represents the fraction of cells expressing each gene in each cluster, as  
1102 shown in scale. Color intensity represents the average normalized expression level.  
1103 **(C)** t-SNE-plots for some known markers of PNs. *ct* labels all PN clusters, *acj6* and

1104 *vvf* are mutually exclusive in Clusters 1, 2 and 4, versus Cluster 3, while *Lim1* is  
1105 specifically expressed in Cluster 4.

1106 **Figure 4 – Distribution of fast-acting neurotransmitters. (A)** t-SNE plot showing  
1107 the distribution of cells expressing *vesicular acetylcholine transporter (VAcHT*,  
1108 cholinergic neurons), *vesicular glutamate transporter (VGlut*, glutamatergic neurons)  
1109 and *glutamic acid decarboxylase 1 (Gad1*, GABA-ergic neurons). For graphical  
1110 reasons only cells expressing each marker above a log normalized value of 2 are  
1111 shown. **(B)** Quantification of cells expressing markers displayed in A. The difference  
1112 to 100% are cells that did not express any of the three markers.

1113 **Figure 5 – Co-expression of neuropeptides in fast-acting neurotransmitter**  
1114 **neurons. (A)** Radar plots showing the co-expression of 16 neuropeptides with the  
1115 three fast-acting NTs. Displayed is the deviation of NT co-expression from the  
1116 average distribution of each gene and combination of genes. **(B)** Distribution of four  
1117 *insulin-like peptides*, including the fat-body specific *Ilp6*, based on the deviation from  
1118 the random distribution of fast-acting neurotransmitter.

1119 **Figure 6 – Genetic markers and co-transmission in monoaminergic neurons.**  
1120 **(A)** Expression of the Vesicular Monoamine Transporter (*Vmat*) labels three clusters  
1121 from Figure 1B (cells in blue, highlighted with arrowheads and circles. **(B)** Re-  
1122 clustering of the three cell populations labeled in (A). Four sub-clusters are identified,  
1123 representing dopaminergic, tyraminergetic, octopaminergic, and serotonergic neurons.  
1124 **(C)** Dot plots showing the main markers distinguishing monoamine populations from  
1125 each other (pairwise comparisons for genes expressed in > 50% of cells in either  
1126 cluster; Log<sub>2</sub> FC > 1, Wilcoxon rank sum test with Bonferroni-corrected p-value <  
1127 0.01). Dot diameter represents the fraction of cells expressing each gene in each  
1128 cluster, as shown in scale. Color intensity represents the average normalized  
1129 expression level. **(D)** Percentage of cells in each monoaminergic cluster that are co-  
1130 expressing markers for fast neurotransmitter-releasing neurons (*VGlut*, *Gad1*, and  
1131 *VAcHT*). **(E)** Dot plots showing expression of genes encoding neuropeptides and  
1132 neuropeptide amidating enzymes across monoaminergic populations. Dot diameter  
1133 represents the fraction of cells expressing each gene in each cluster, as shown in  
1134 scale. Color intensity represents the average normalized expression level. **(F)**  
1135 Comparison of genes overexpressed in PAM dopaminergic neurons compared to the  
1136 rest of the brain, measured with Drop-seq or with FACS and Smart-seq2. 9 of the 15  
1137 genes identified with Drop-seq (labeled in bold) were also found in the Smart-seq2  
1138 dataset.

1139 **Figure 6 – Localization of genes involved in dopamine metabolism and**  
1140 **signaling. (A)** Schematics of a dopaminergic synapse, representing the major  
1141 proteins involved in dopamine signaling and metabolism. Drawing inspired by  
1142 Yamamoto and Seto, 2014 **(B)** Dot plots showing the expression of these genes  
1143 across all cell populations identified in the *Drosophila* brain. Dot diameter represents  
1144 the fraction of cells expressing each gene in each cluster, as shown in scale. Color  
1145 intensity represents the average normalized expression level.

1146 **Figure 8 – Expression patterns of nicotinic acetylcholine receptors. (A)**  
1147 Prevalence of nicotinic receptor subunits. **(B)** Heatmap showing Pearson correlation  
1148 coefficient Z-scores for each receptor subunit pair.

1149 **Figure 9 – Co-expression of neuronal activity markers.** Heatmap showing  
1150 Pearson correlation coefficient Z-scores of activity-regulated genes (ARGs), as  
1151 reported by Chen et al., 2016 (histogram on top). Ten most highly upregulated genes  
1152 following ChR2-XXL-induced activation of all neurons that are expressed in the brain,  
1153 ranked by their correlation.

1154

#### 1155 **Supplementary Figure Legends**

1156 **Figure 1 – Figure supplement 1– Preliminary validation of Drop-seq on insect**  
1157 **cells. (A)** Schematic of a Drop-seq experiment that was run to analyze a mixture of  
1158 *Drosophila* (S2; blue) and *Spodoptera* (Sf9; red) cells. **(B)** Scatter plot (Barnyard)  
1159 indicating the number of transcripts from *Drosophila* or *Spodoptera* associated with  
1160 each STAMP. Of 768 STAMPs analyzed, only 12 (1.56%) carried transcripts from  
1161 both species (purple dots).

1162 **Figure 1 – Figure supplement 2 – Comparison of different quality filters. (A-C)**  
1163 Left: histograms representing the distribution of numbers of UMIs per cell selected  
1164 with cutoffs of 200 (A), 800 (B) and 1800 (C) UMIs per cell. Right: t-SNE plots of the  
1165 same data set as in Fig. 1B. obtained with these cutoffs to compare the impact of  
1166 number of cells and UMI coverage on t-SNE clusters.

1167 **Figure 1 – Figure supplement 3 – t-SNE plot showing all eight replicates.** t-SNE  
1168 plot as in Fig. 1B, with cells from each replicate in a different color.

1169 **Figure 1 – Figure supplement 4 – Sex-determination of individual brain cells.**  
1170 **(A)** Histogram showing the number of UMIs per cell. The dashed line indicates the  
1171 threshold that was chosen to separate *roX1*-positive and *roX1*-negative cells. **(B)** t-

1172 SNE plot showing putative male and female cells, based on *roX1* expression. Pie-  
1173 chart shows the frequency of “male” and “female” cells.

1174 **Figure 1**

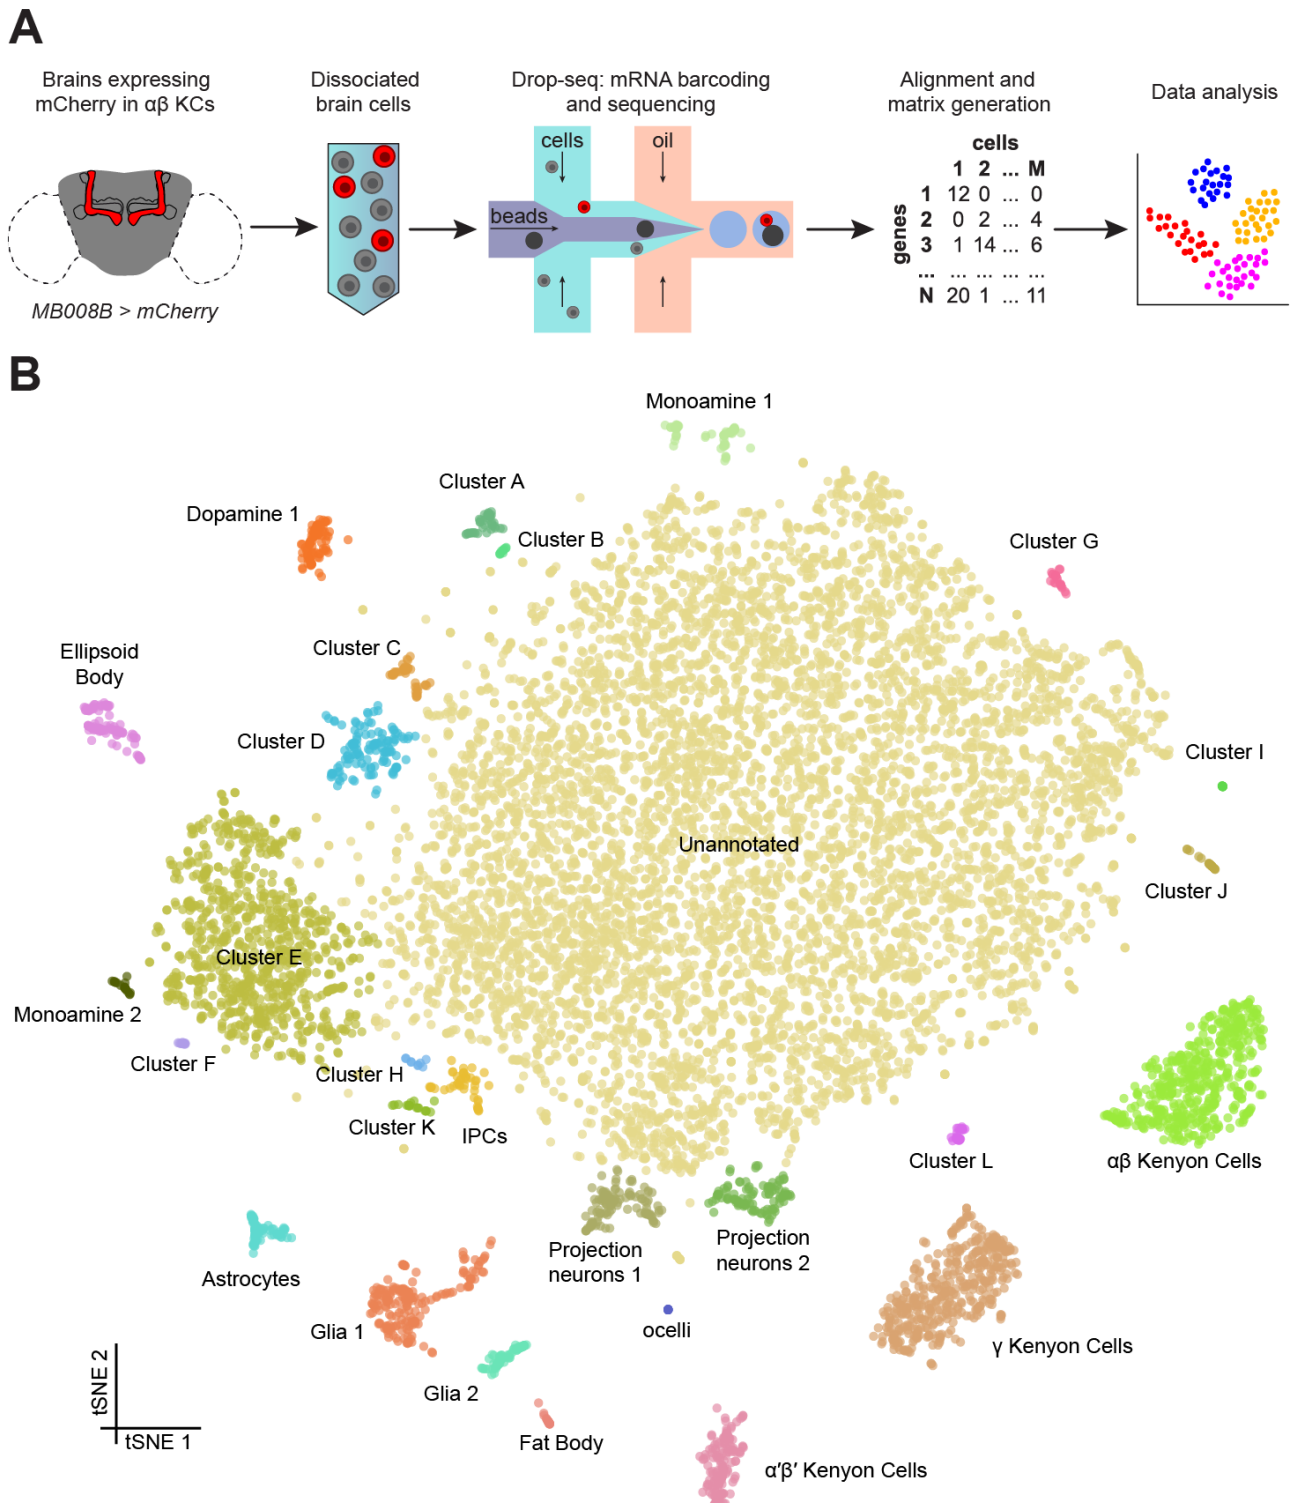

1175 **Figure 2**

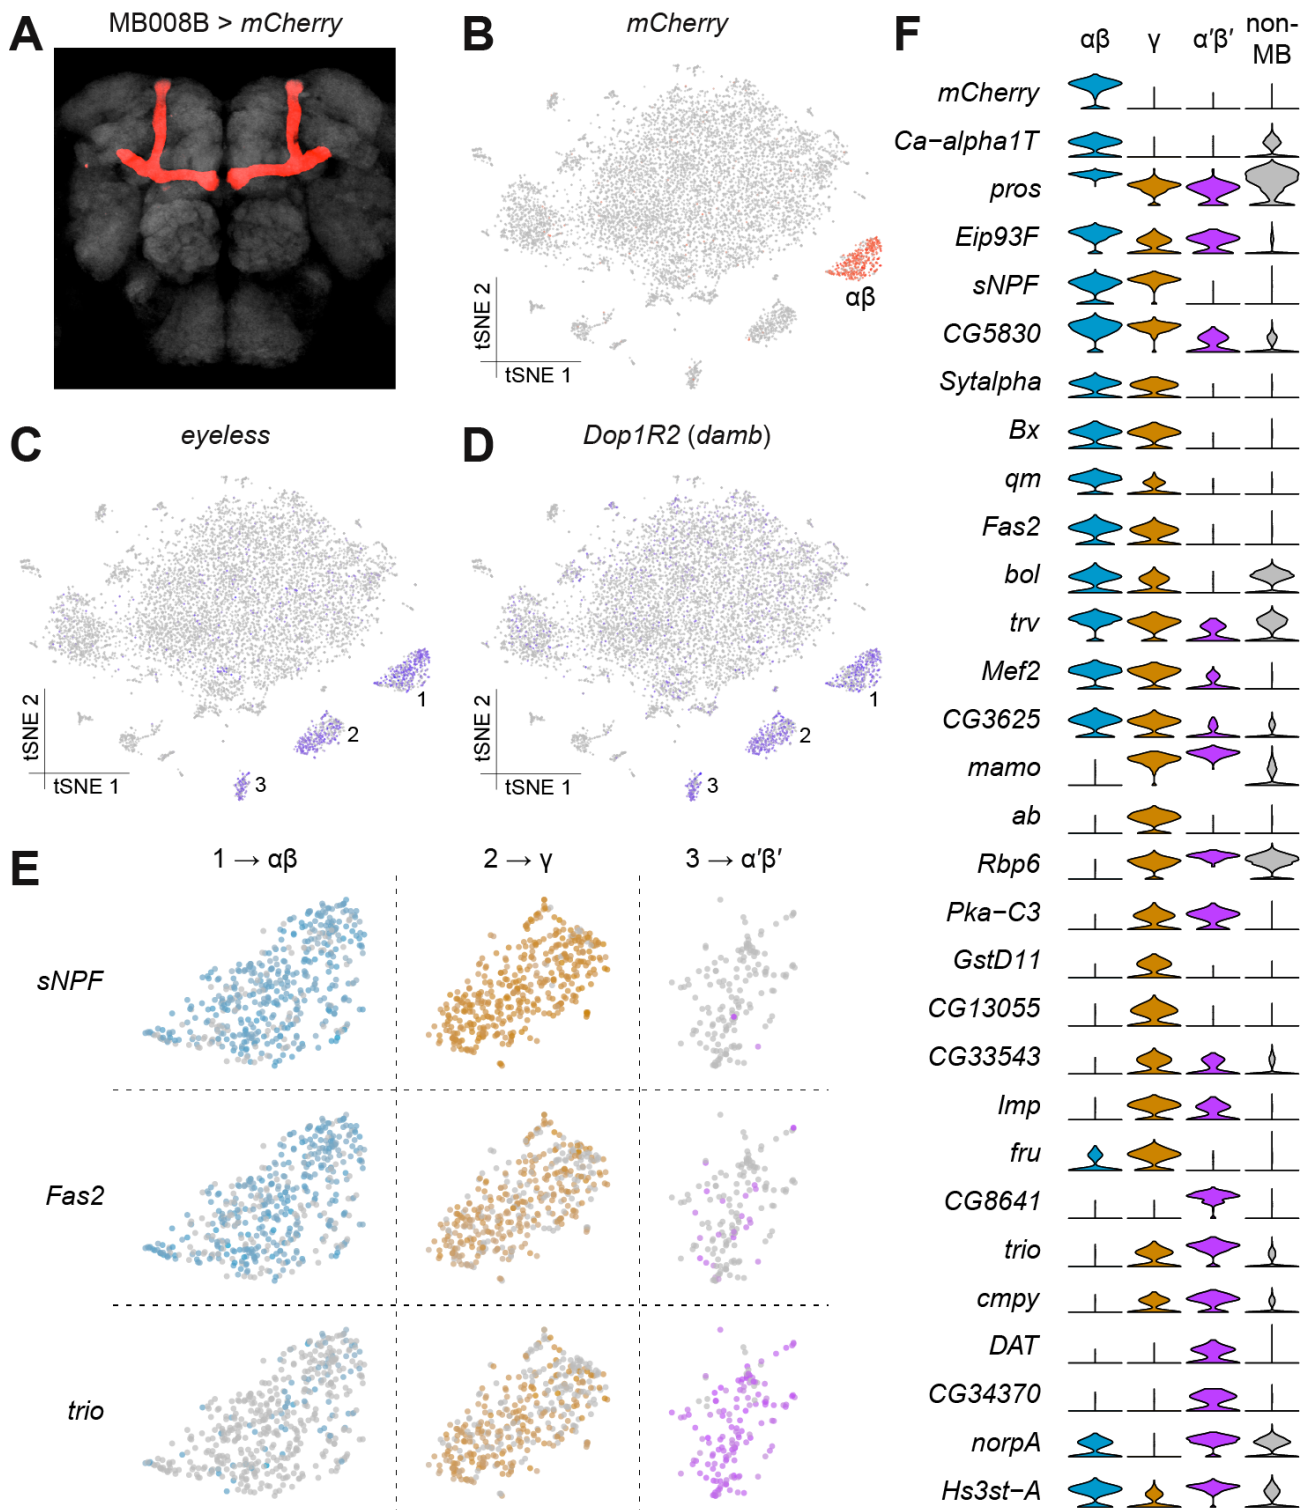

1176 **Figure 3**

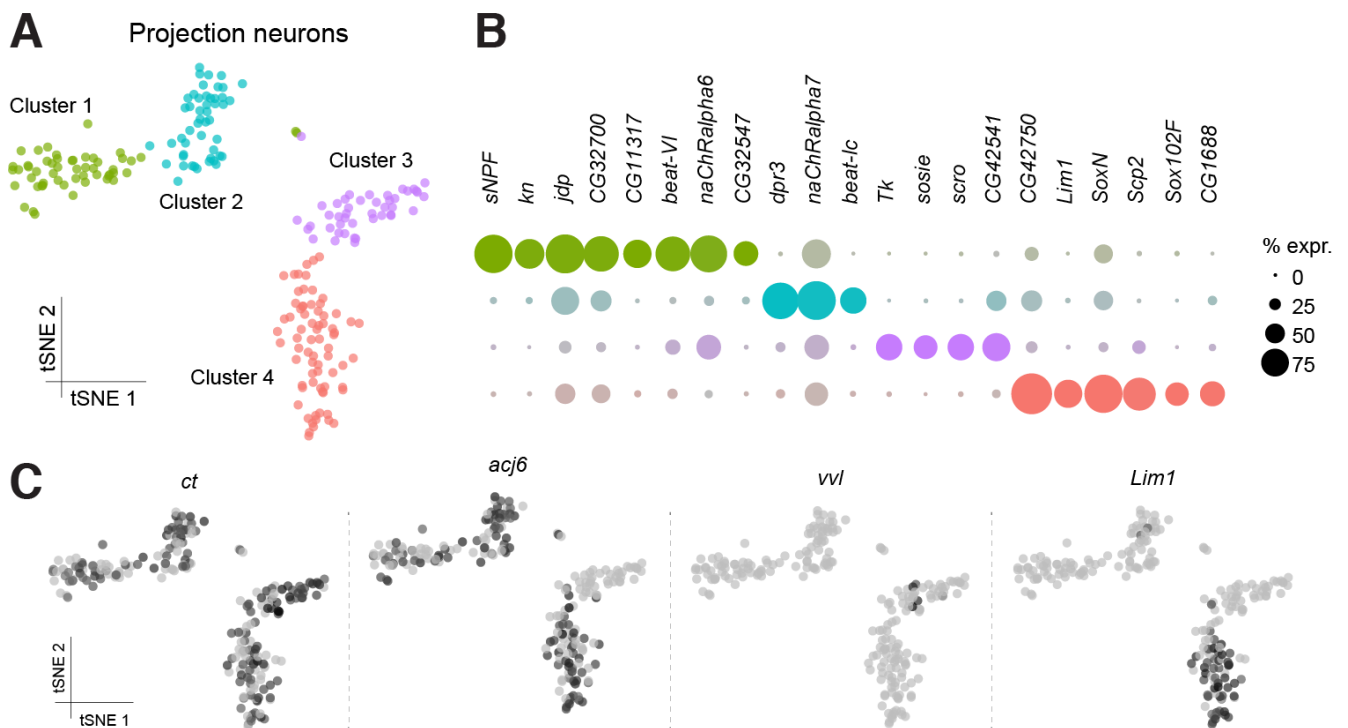



1177 **Figure 4**

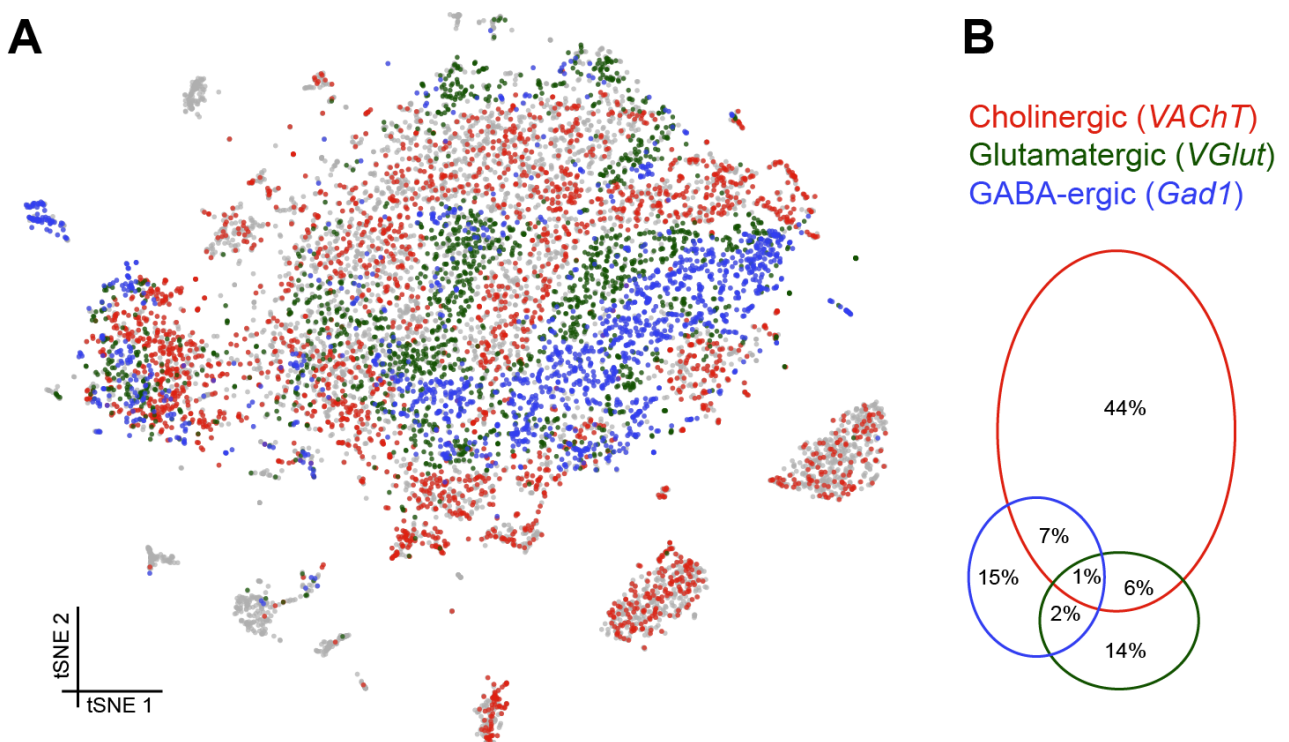

1178 **Figure 5**

**A**

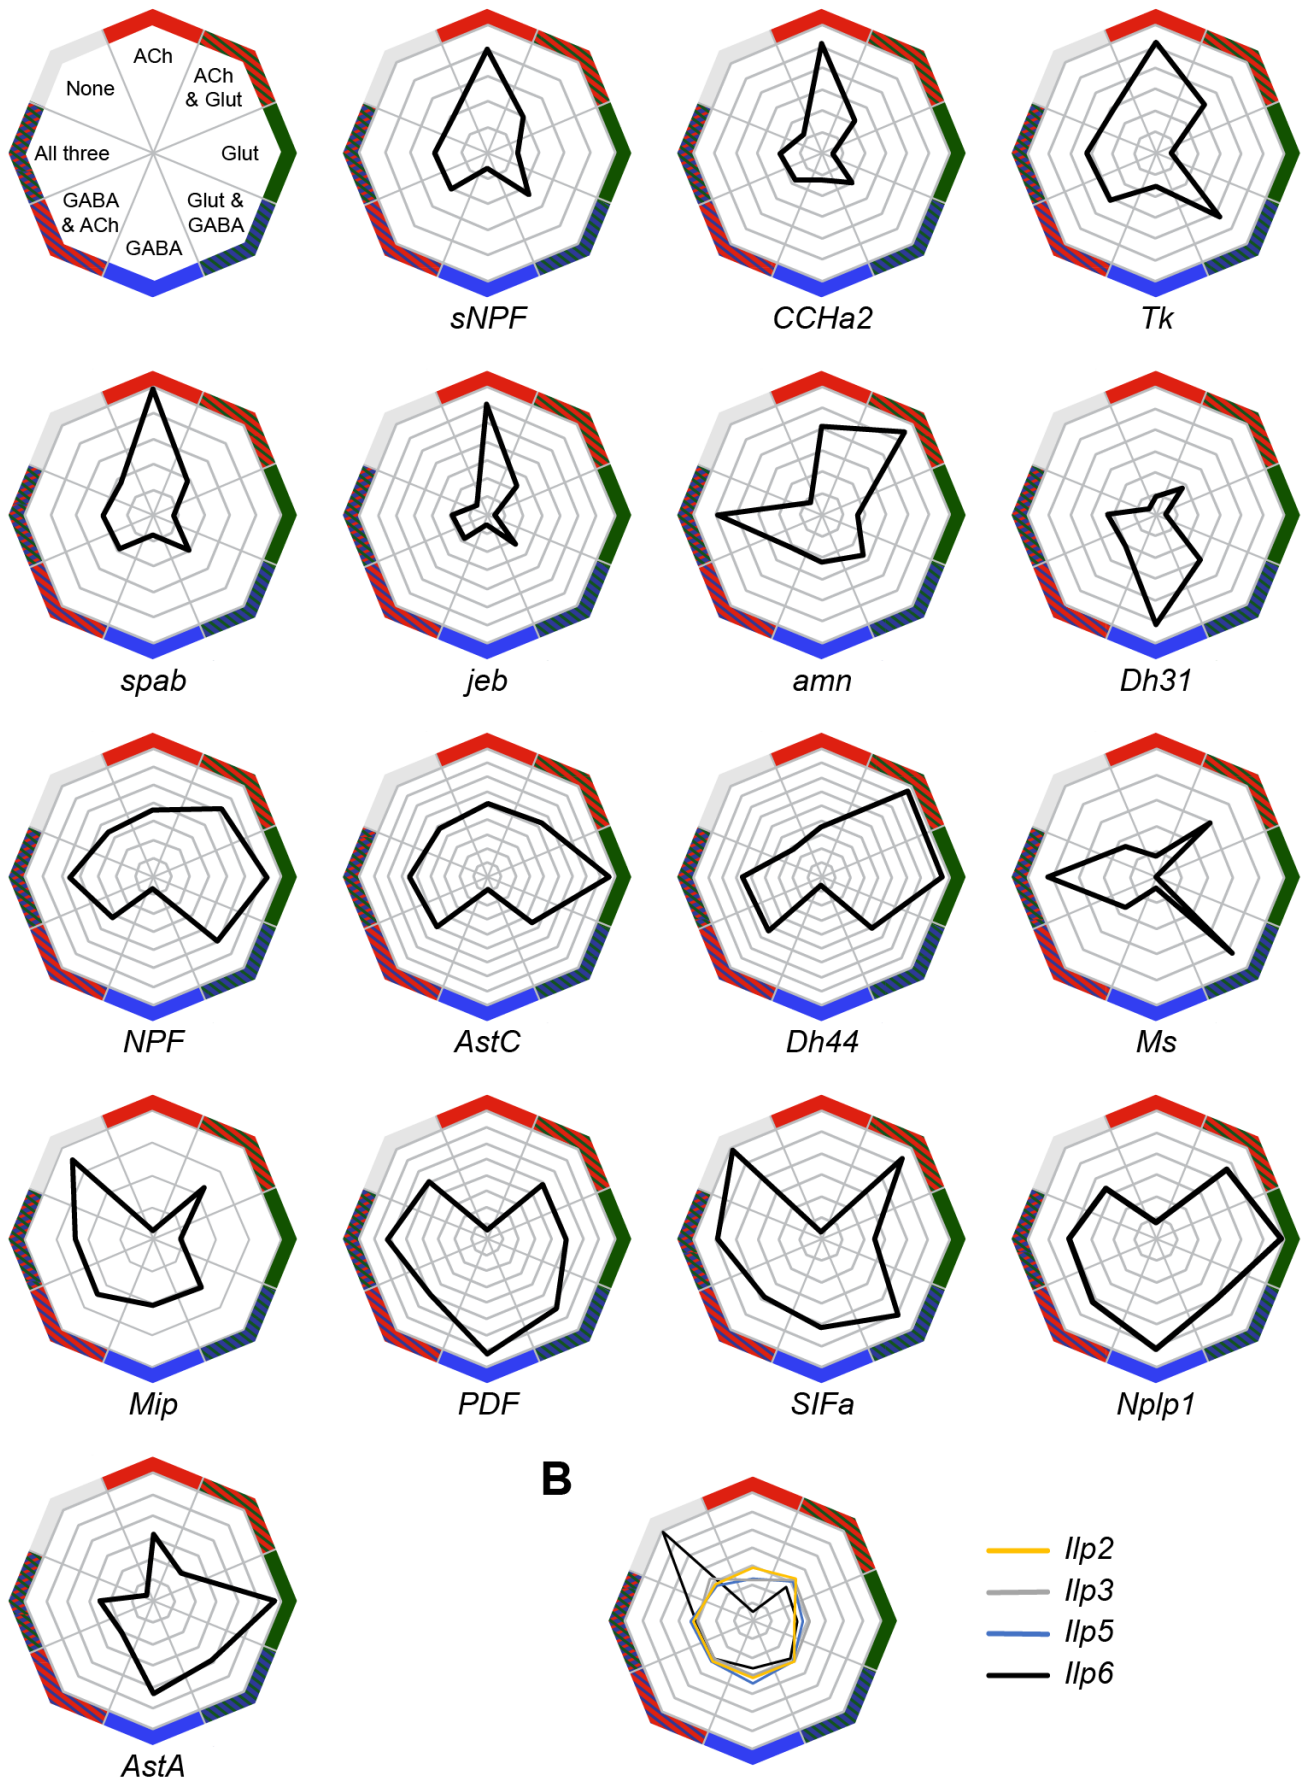

1179 **Figure 6**

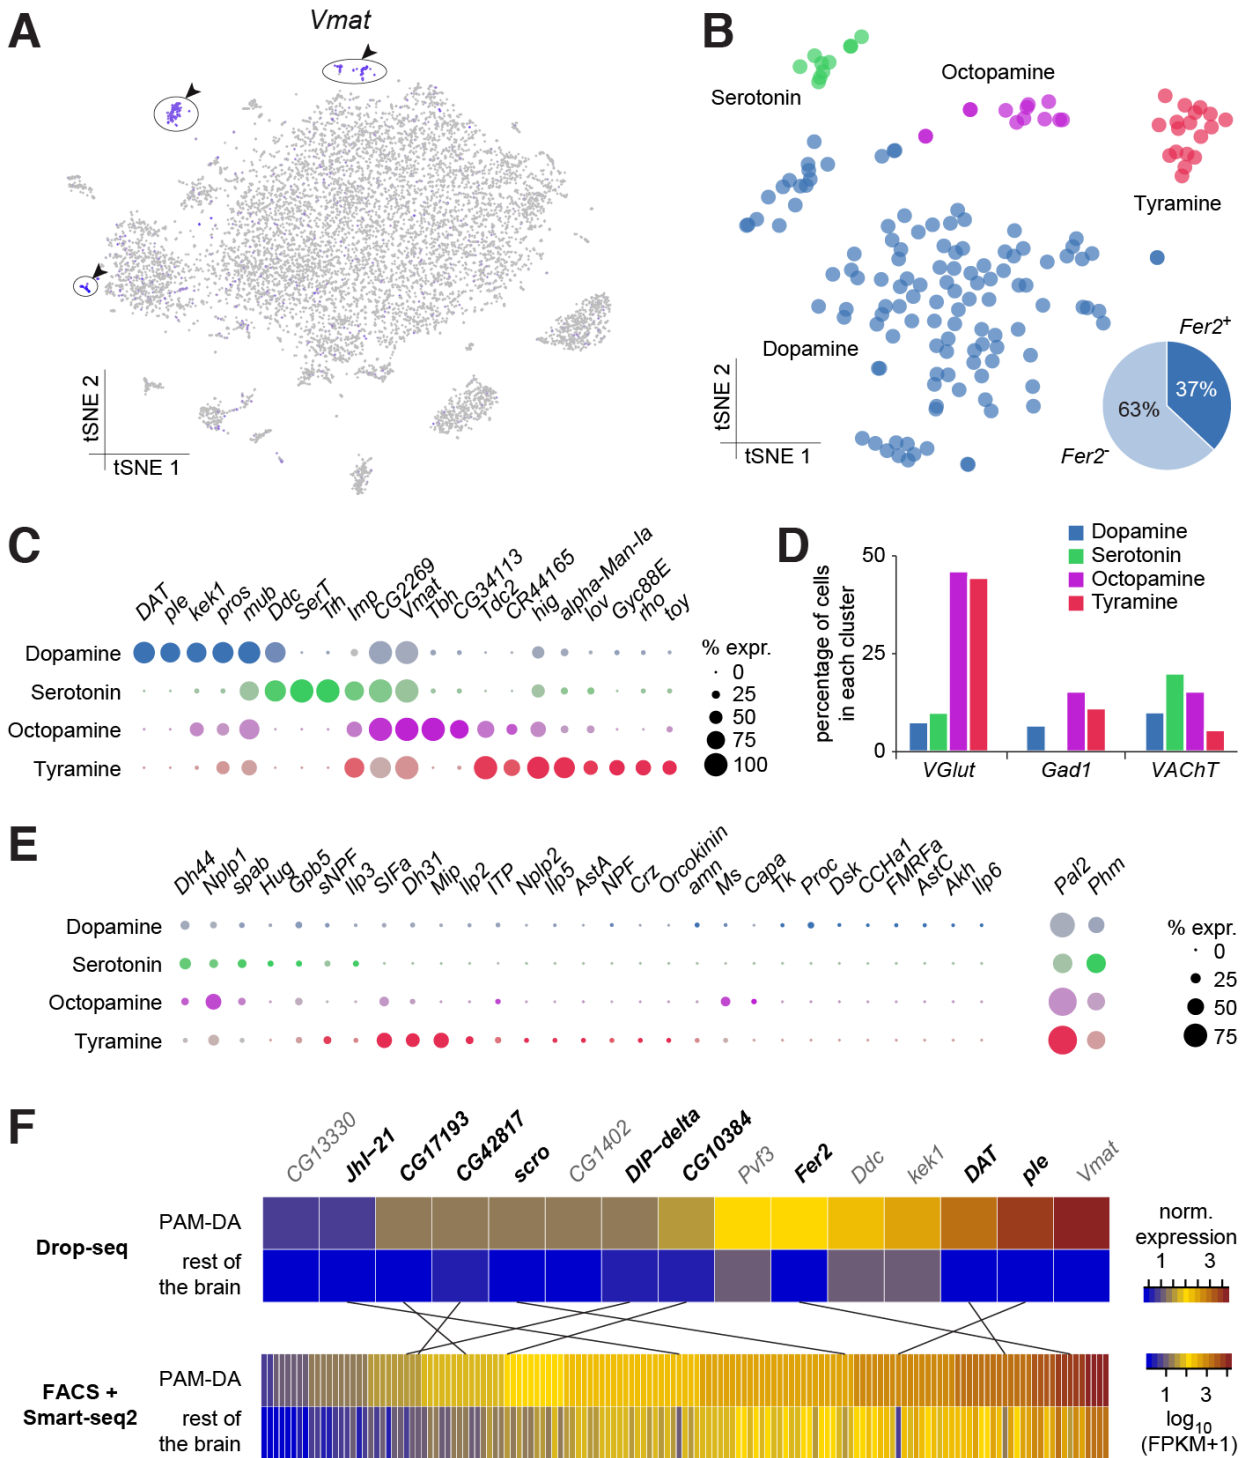

1180 **Figure 7**

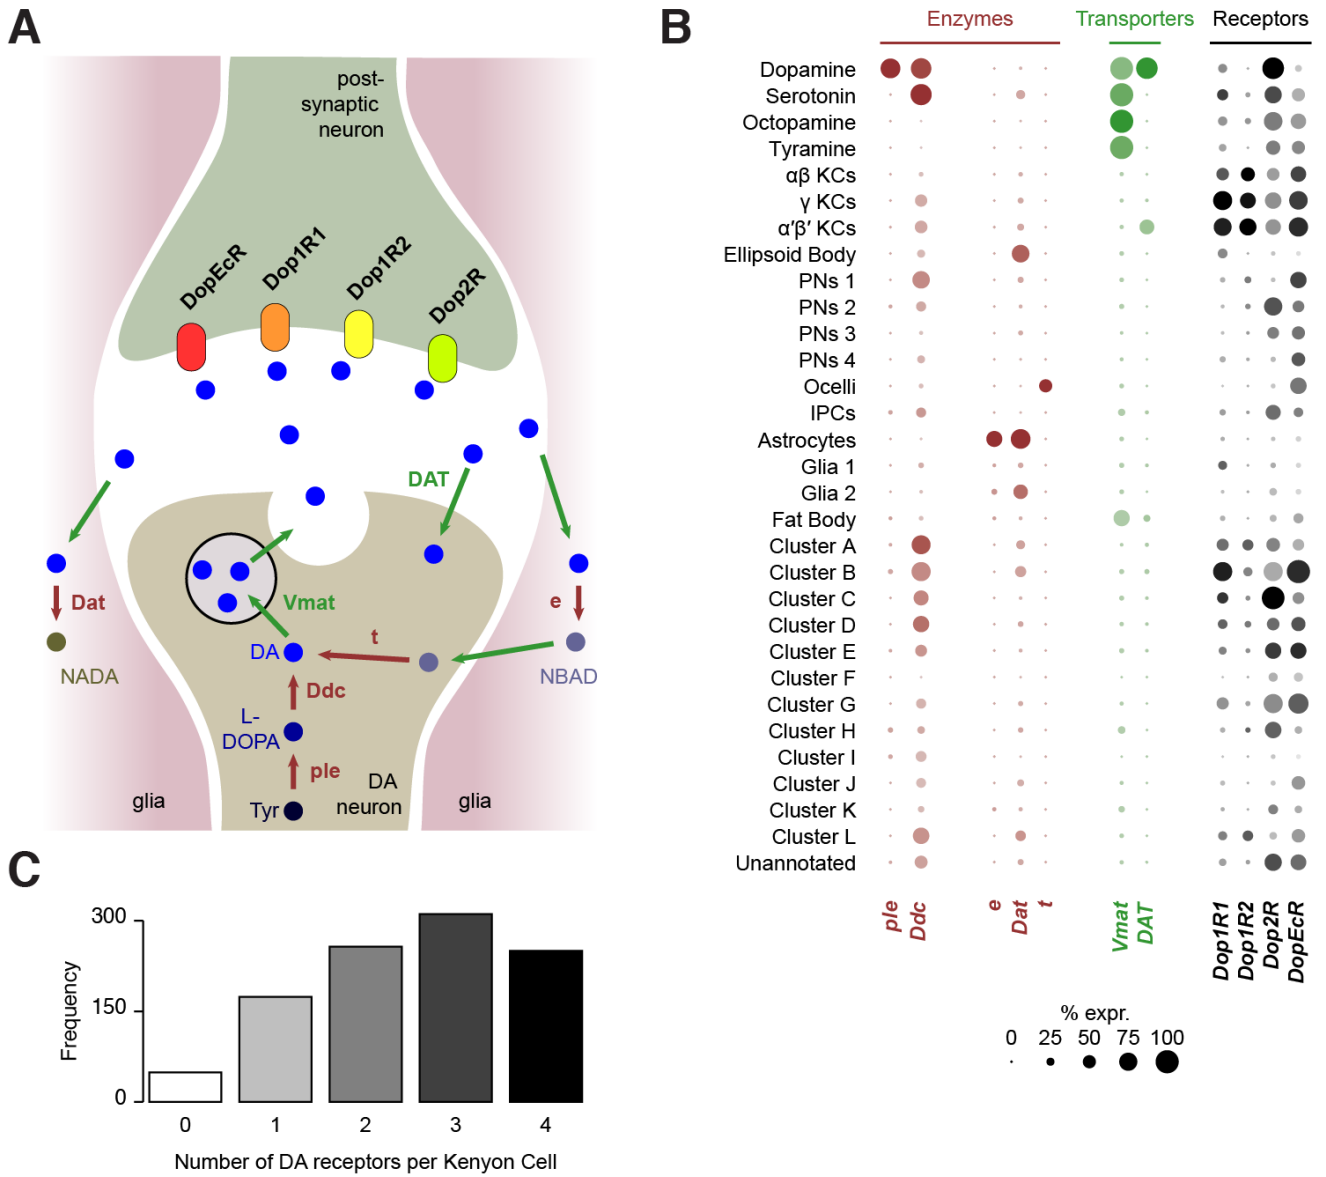

1181 **Figure 8**

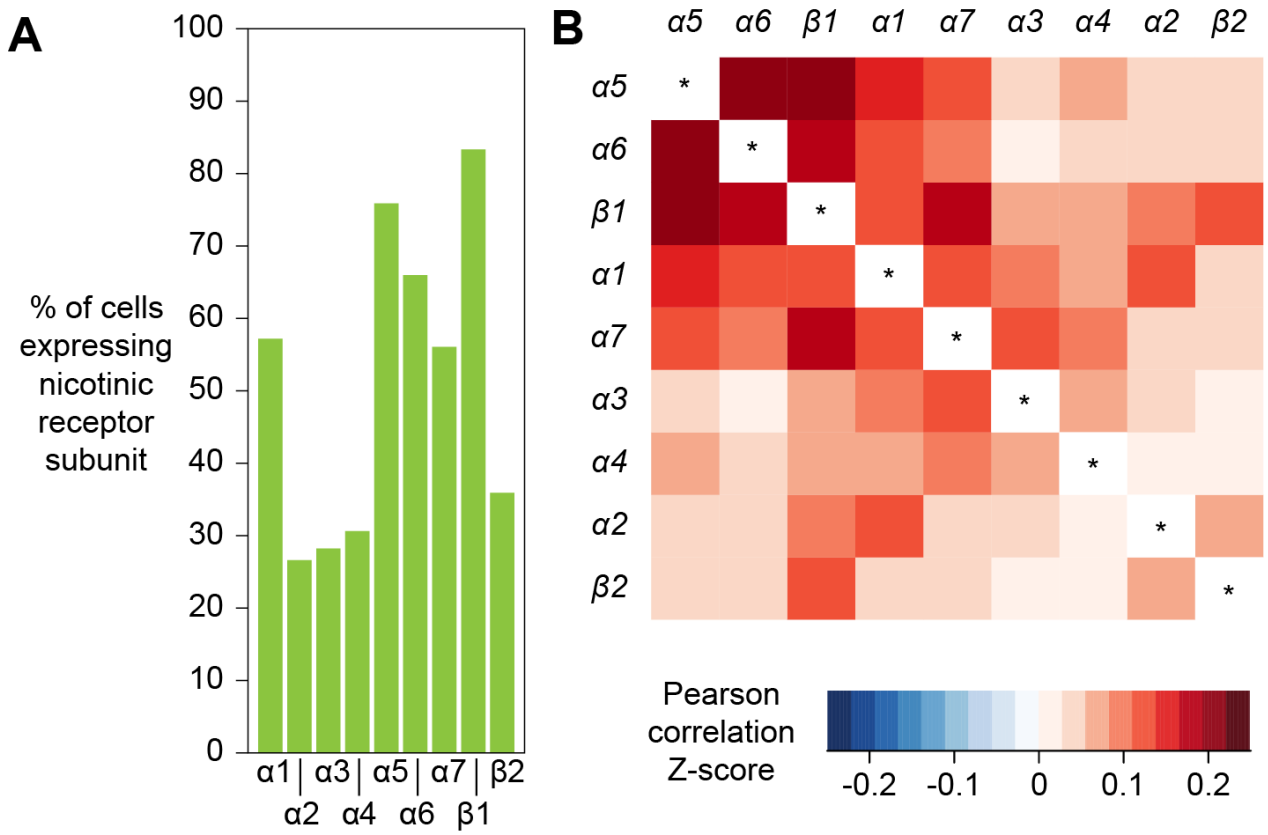

1182 **Figure 9**

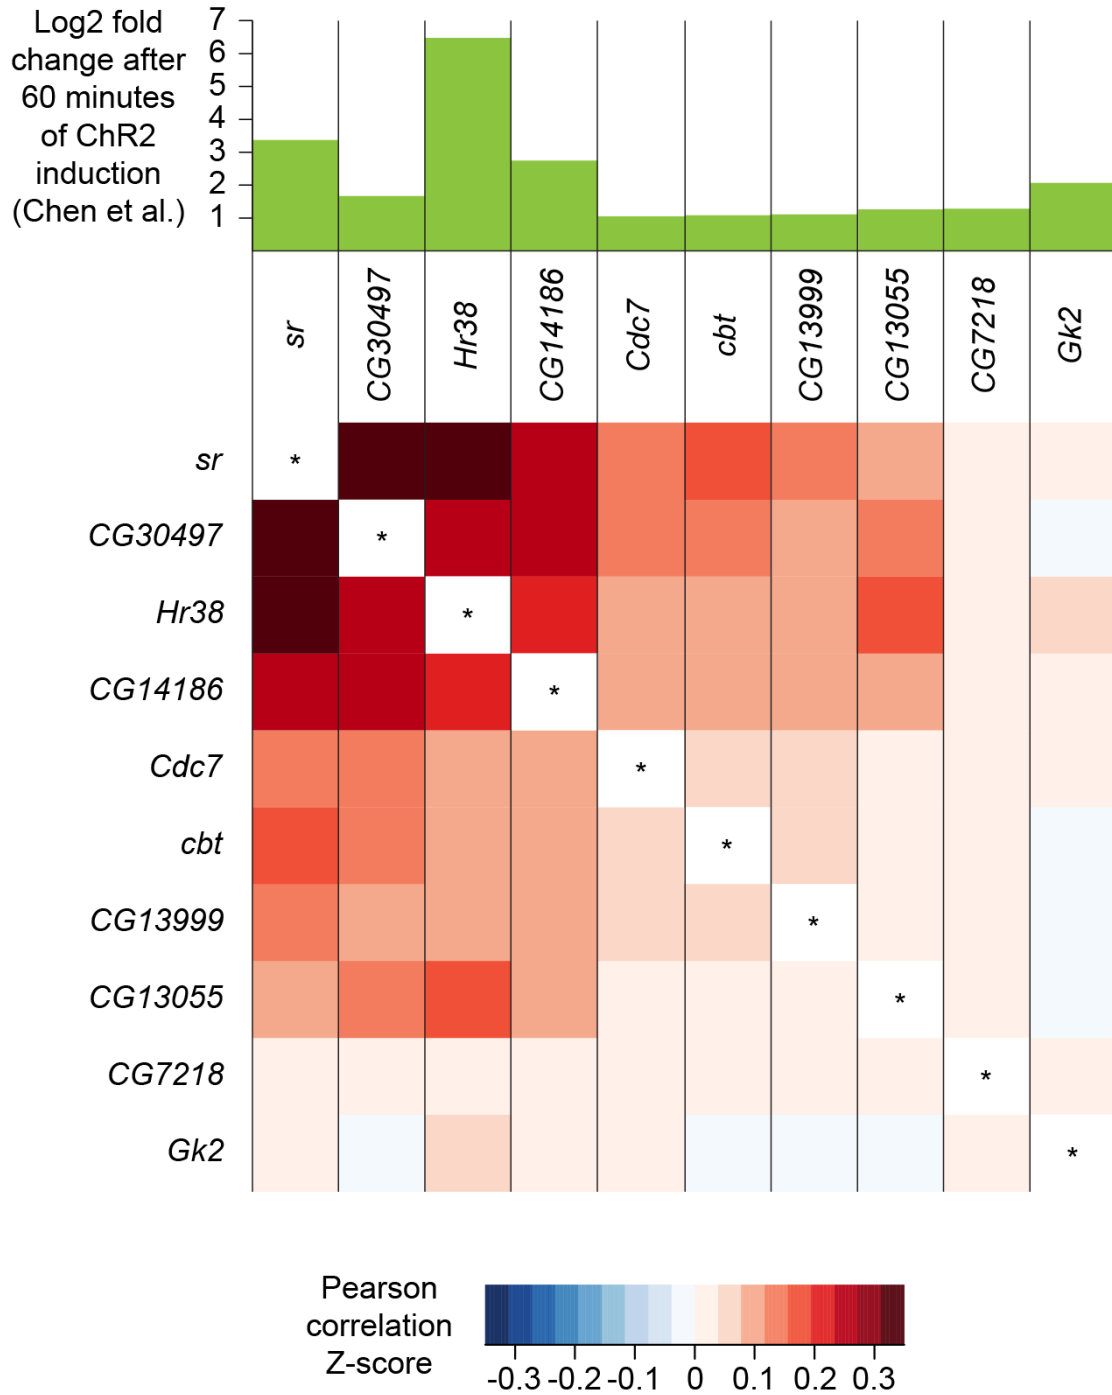

1183 **Figure 1 - Figure supplement 1**

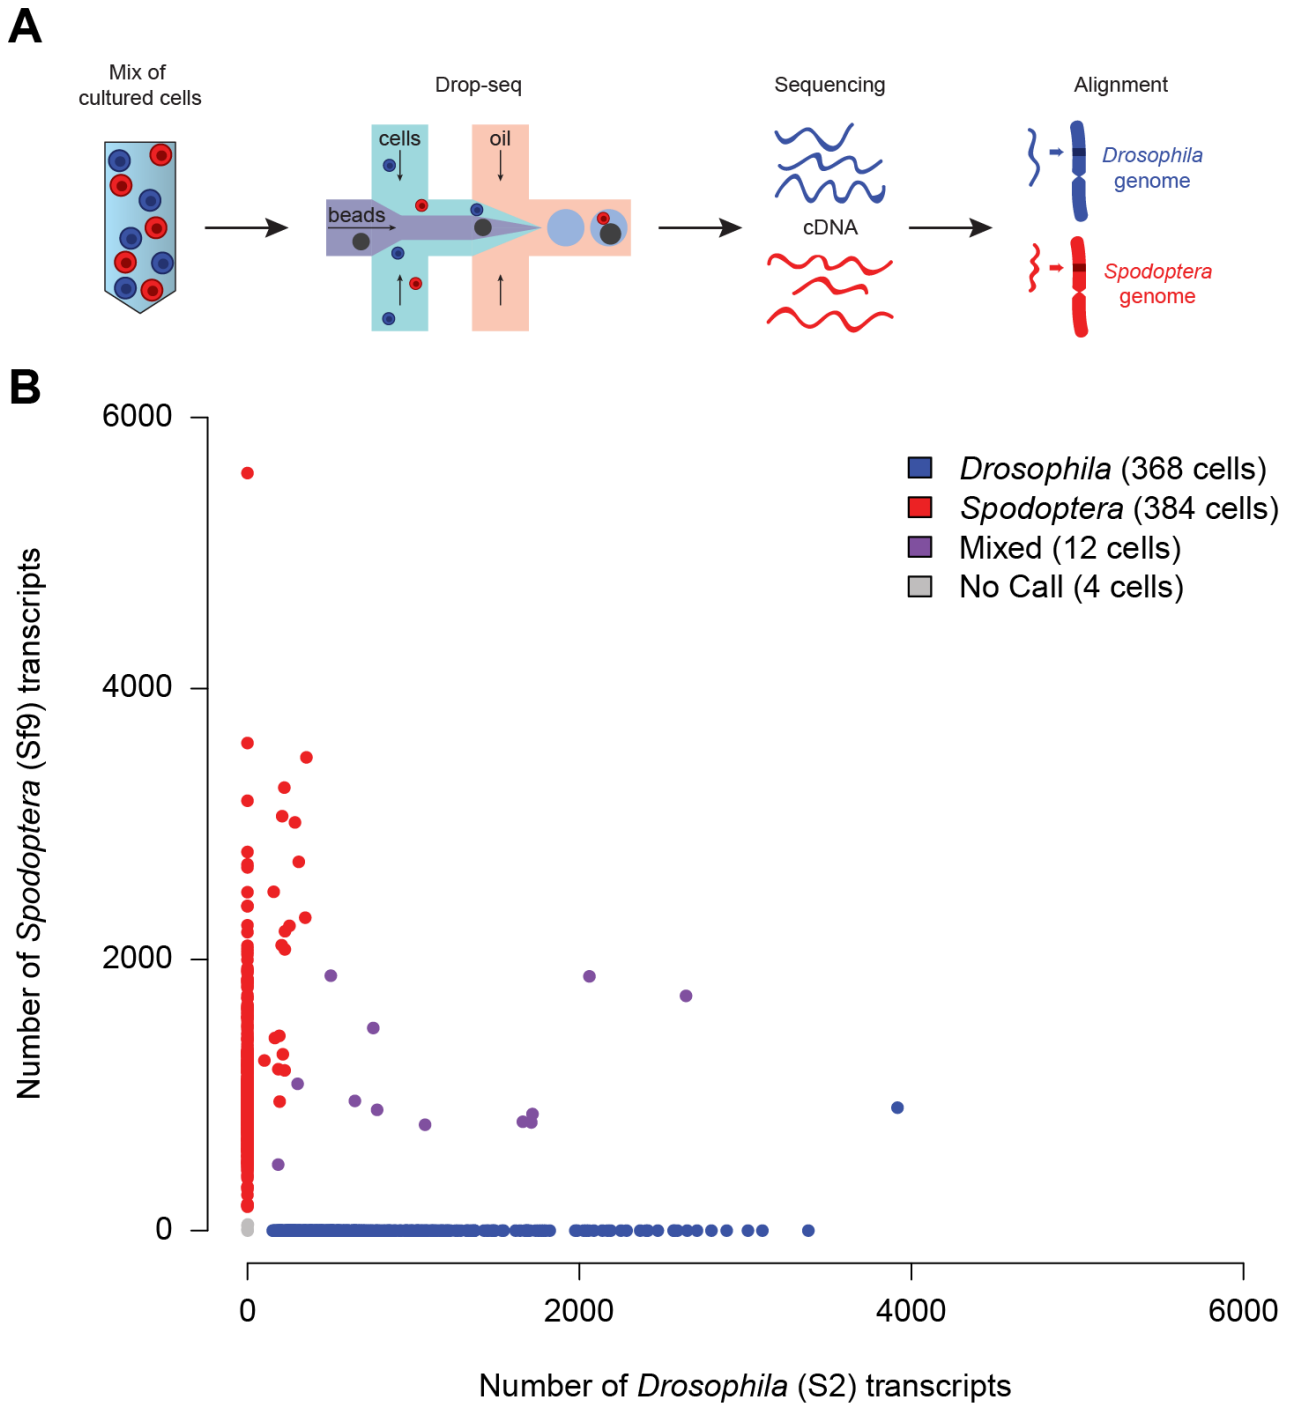

1184 **Figure 1 - Figure supplement 2**

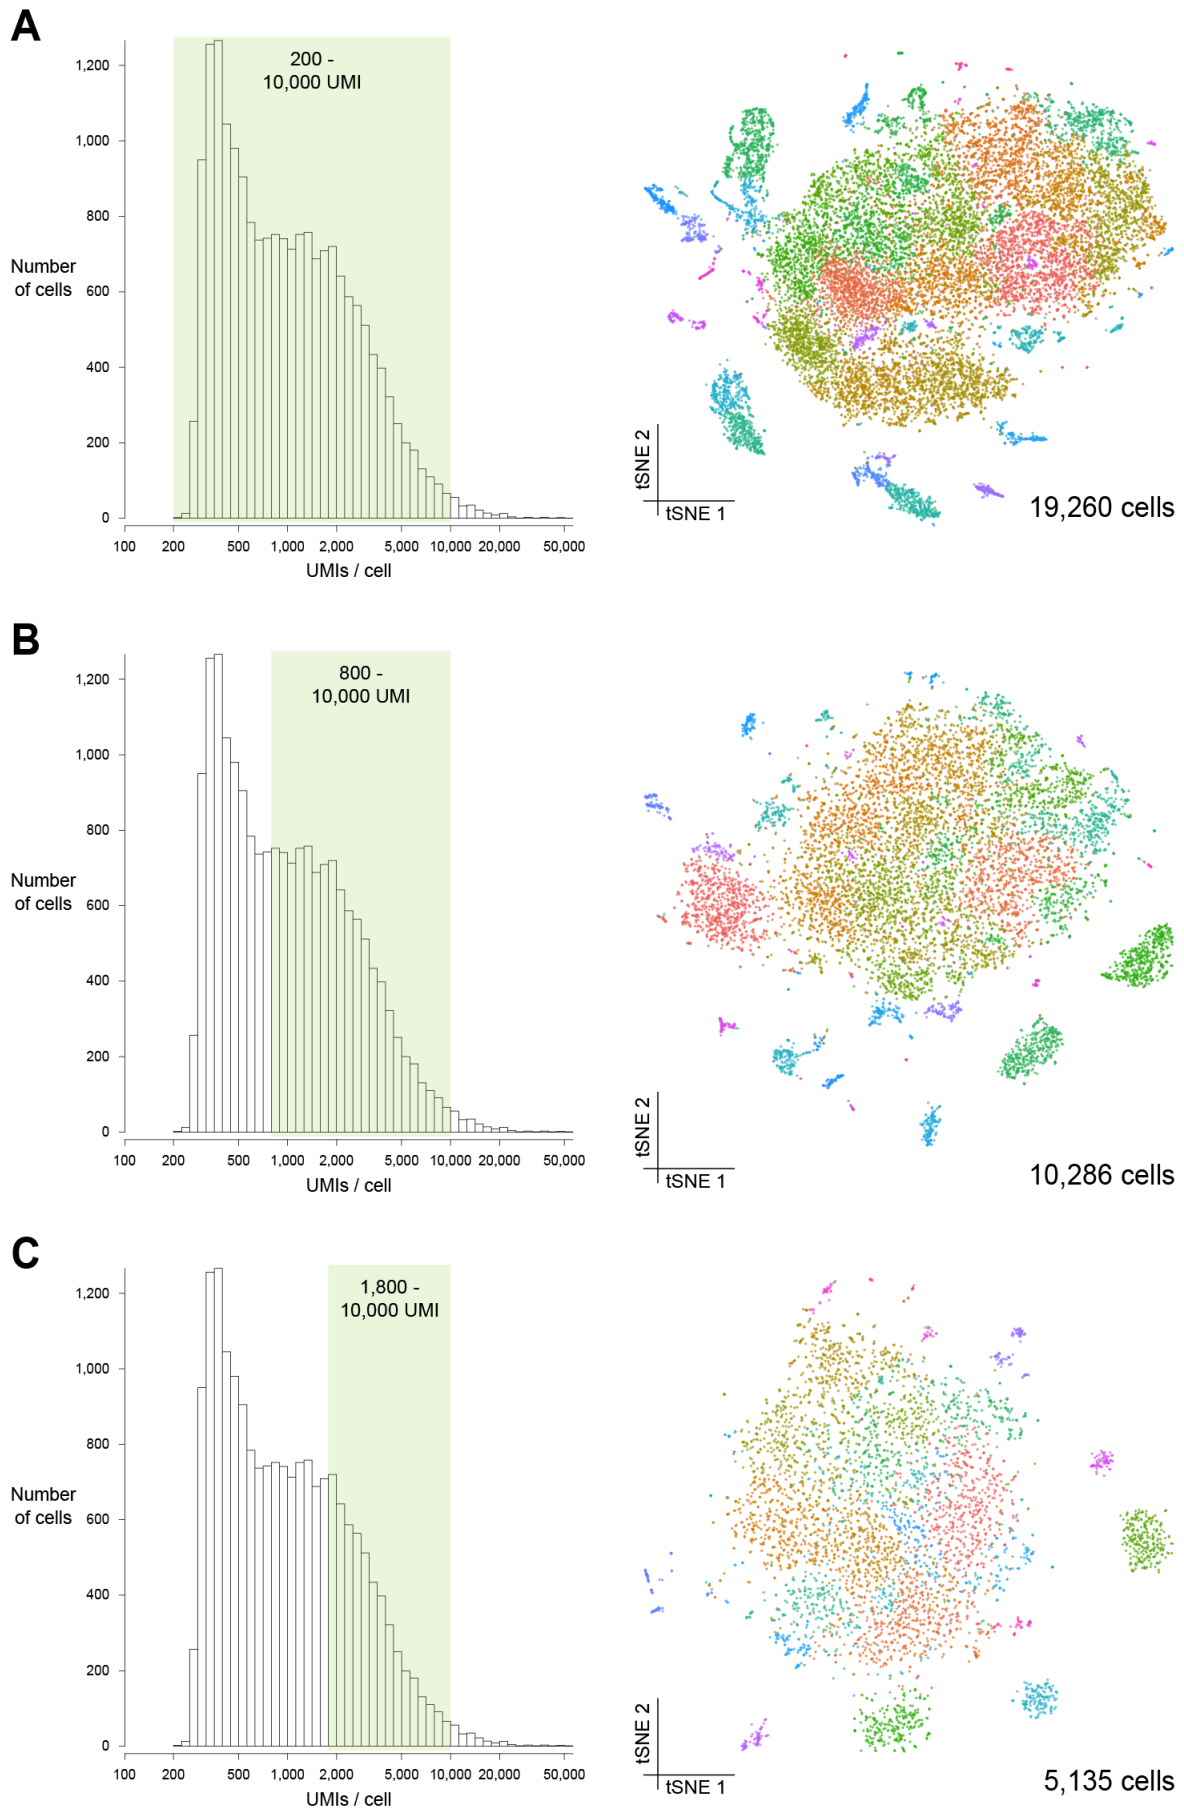



1185 **Figure 1 - Figure supplement 3**

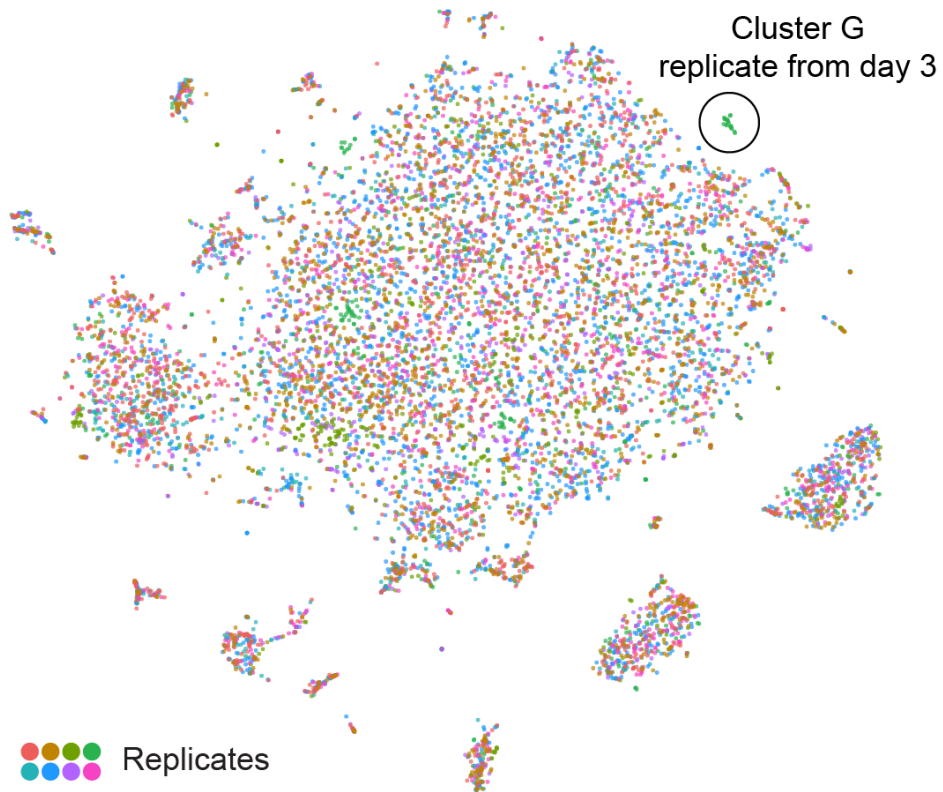

1186 **Figure 1 - Figure supplement 4**

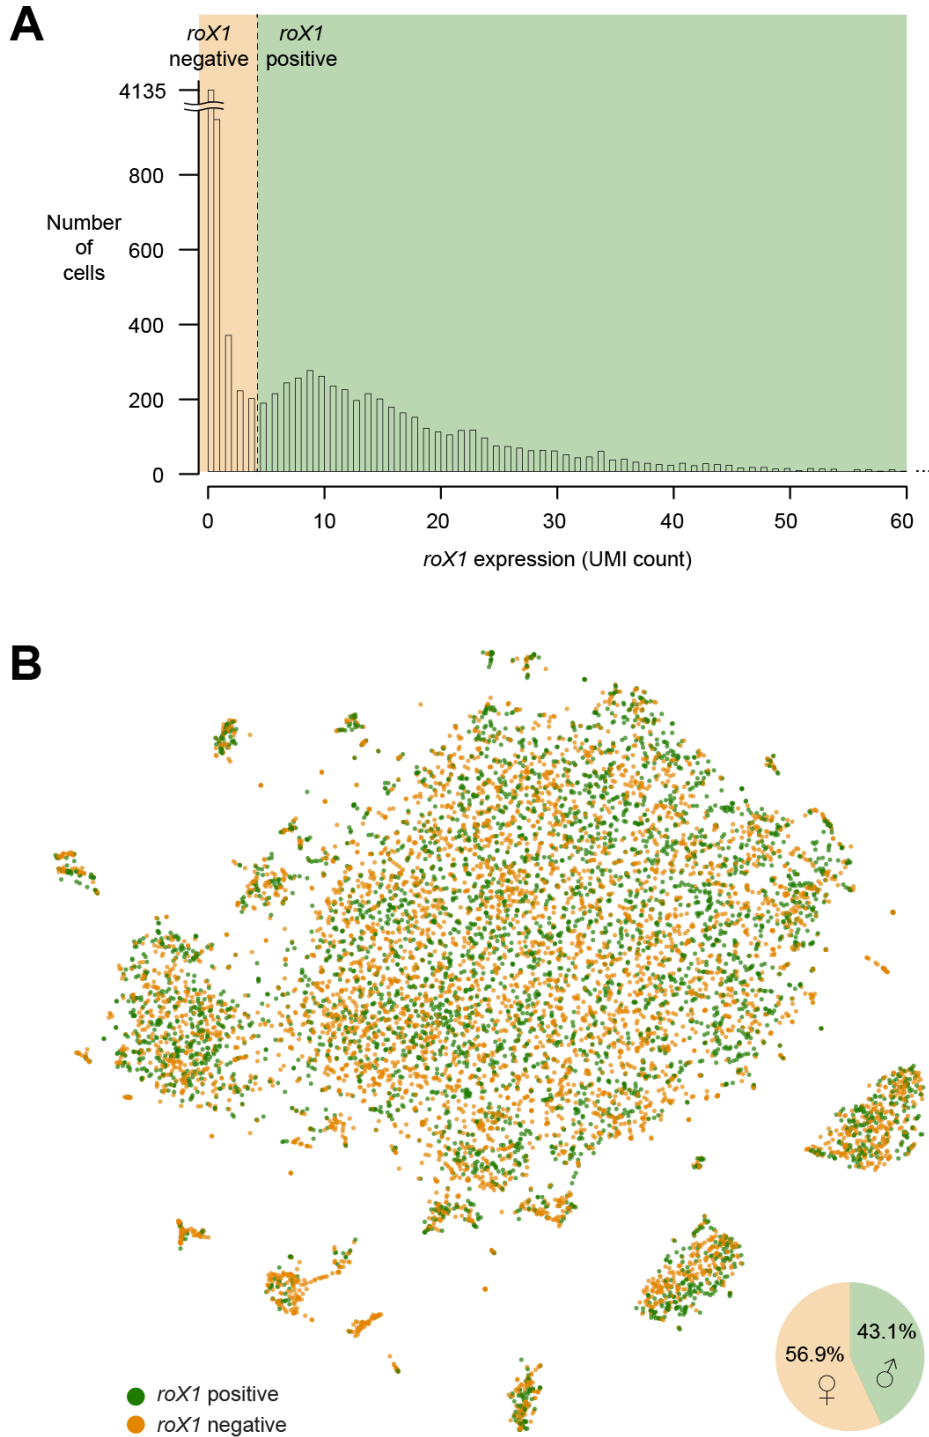

Source: http://biorxiv.org/content/10.1101/237818v1.full.pdf
